# Supplementary material
Source: PubMed Central journal article supplement (PMC6296877)
Supplement: NIHMS992637-supplement-Supp_info.pdf [file NIHMS992637-supplement-Supp_info.pdf]

**Supp. Table 1.** Pathogenicity prediction programs and scores for the novel missense variants identified in our cohort.

| Gene           | Variant    | Protein change  | PolyPhen-2 <sup>(1)</sup> | PolyPhen-2 score | SIFT <sup>(2)</sup> | SIFT score | Mutation taster <sup>(3)</sup> | Mutation taster probability |
|----------------|------------|-----------------|---------------------------|------------------|---------------------|------------|--------------------------------|-----------------------------|
| <i>ADGRV1</i>  | c.1055C>T  | p.(Pro352Leu)   | Probably damaging         | 1                | Deleterious         | 0          | Disease causing                | 1                           |
| <i>CDH23</i>   | c.6083A>C  | p.(Asp2028Ala)  | Probably damaging         | 0.999            | Deleterious         | 0          | Polymorphism                   | 1                           |
| <i>CDH23</i>   | c.6202A>C  | p.(Thr2068Pro)  | Benign                    | 0.251            | Deleterious         | 0.04       | Disease causing                | 1                           |
| <i>CLCNKA</i>  | c.1985G>T  | p.(Gly662Val)   | Probably damaging         | 1                | Deleterious         | 0          | Disease causing                | 1                           |
| <i>GPSM2</i>   | c.138C>A   | p.(Phe46Leu)    | Benign                    | 0.007            | Deleterious         | 0.02       | Disease causing                | 1                           |
| <i>GRXCR1</i>  | c.655G>A   | p.(Glu219Lys)   | Benign                    | 0.104            | Deleterious         | 0          | Disease causing                | 1                           |
| <i>LHFPL5</i>  | c.452G>T   | p.(Gly151Val)   | Probably damaging         | 1                | Deleterious         | 0          | Disease causing                | 1                           |
| <i>MYO7A</i>   | c.20G>T    | p.(Gly7Val)     | Probably damaging         | 1                | Deleterious         | 0          | Disease causing                | 1                           |
| <i>MYO7A</i>   | c.247C>A   | p.(Arg83Ser)    | Probably damaging         | 1                | Deleterious         | 0          | Disease causing                | 1                           |
| <i>MYO7A</i>   | c.3364C>A# | p.(Leu1122Ile)  | Benign                    | 0.015            | Tolerated           | 0.72       | Disease causing                | 0.998                       |
| <i>MYO7A</i>   | c.3590T>C  | p.(Leu1197Pro)  | Probably damaging         | 1                | Deleterious         | 0          | Disease causing                | 1                           |
| <i>MYO7A</i>   | c.3728C>G  | p.(Pro1243Arg ) | Probably damaging         | 0.992            | Deleterious         | 0          | Disease causing                | 1                           |
| <i>MYO7A</i>   | c.4505A>G  | p.(Asp1502Gly)  | Possibly damaging         | 0.908            | Deleterious         | 0          | Disease causing                | 1                           |
| <i>MYO7A</i>   | c.5345G>C  | p.(Gly1782Ala)  | Probably damaging         | 0.999            | Deleterious         | 0          | Disease causing                | 1                           |
| <i>MYO7A</i>   | c.5522C>G  | p.(Thr1841Arg)  | Probably damaging         | 0.972            | Deleterious         | 0          | Disease causing                | 1                           |
| <i>OTOF</i>    | c.1550T>C  | p.(Leu517Pro)   | Probably damaging         | 0.998            | Deleterious         | 0          | Disease causing                | 1                           |
| <i>OTOF</i>    | c.1904T>A  | p.(Val635Asp)   | Possibly damaging         | 0.904            | Deleterious         | 0          | Disease causing                | 1                           |
| <i>OTOF</i>    | c.3514C>T  | p.(Arg1172Trp)  | Probably damaging         | 1                | Deleterious         | 0          | Disease causing                | 1                           |
| <i>OTOF</i>    | c.5714G>T  | p.(Gly1905Val)  | Probably damaging         | 0.997            | Deleterious         | 0          | Disease causing                | 1                           |
| <i>PCDH15</i>  | c.788C>A   | p.(Pro263Gln)   | Probably damaging         | 1                | Deleterious         | 0          | Disease causing                | 1                           |
| <i>POU4F3</i>  | c.374C>T   | p.(Pro125Leu)   | Benign                    | 0.021            | Deleterious         | 0.03       | Disease causing                | 1                           |
| <i>SLC26A4</i> | c.317C>T   | p.(Ala106Val)   | Probably damaging         | 0.969            | Deleterious         | 0          | Disease causing                | 1                           |
| <i>TECTA</i>   | c.1774G>A  | p.(Val592Met)   | Possibly damaging         | 0.482            | Tolerated           | 0.17       | Disease causing                | 0.998                       |
| <i>TMC1</i>    | c.1259G>A  | p.(Cys420Tyr)   | Possibly damaging         | 0.812            | Deleterious         | 0          | Disease causing                | 1                           |
| <i>TMC1</i>    | c.1728C>G  | p.(Asn576Lys)   | Possibly damaging         | 0.797            | Deleterious         | 0.02       | Disease causing                | 1                           |

(1) Polyphen-2, <http://genetics.bwh.harvard.edu/pph2/bgi.shtml>, cut-off: <0.10 FPR (probably damaging)

(2) SIFT(from PROVEAN), [http://provean.jcvi.org/genome\\_submit\\_2.php?species=human](http://provean.jcvi.org/genome_submit_2.php?species=human), cut-off: <0.05 (damaging)

(3 ) MutationTaster, <http://www.mutationtaster.org/>, cut-off: 1 = high confidence of prediction

(#) This variant was found damaging by FATHMM, <http://fathmm.biocompute.org.uk/fathmm-xf/>

**Supp. Table S2.** Pathogenicity prediction programs scores for the novel splice-site variants identified in our cohort.

| <b>Gene</b>    | <b>Variant</b> | <b>dbscSNV1.1<br/>ADA SCORE<sup>(1)</sup></b> | <b>dbscSNV1.1<br/>RF SCORE<sup>(1)</sup></b> | <b>HSF3.0 prediction<sup>(2)</sup></b>                             |
|----------------|----------------|-----------------------------------------------|----------------------------------------------|--------------------------------------------------------------------|
| <i>EPS8</i>    | c.205-8A>G     | 0.9993                                        | 0.934                                        | Activation of an intronic cryptic acceptor site                    |
| <i>MSRB3</i>   | c.412-1G>A     | 1                                             | 0.938                                        | Broken WT Acceptor Site                                            |
| <i>MYO7A</i>   | c.5326+3A>G    | not available                                 | not available                                | Broken WT Donor Site, activation of an intronic cryptic donor site |
| <i>MYO7A</i>   | c.5856+5G>C    | 0.9992                                        | 0.914                                        | Broken WT Donor Site                                               |
| <i>OTOF</i>    | c.4799+1G>A    | not available                                 | not available                                | Broken WT Donor Site                                               |
| <i>PTPRQ</i>   | c.6739-1G>A    | not available                                 | not available                                | WT site broken, activation of an intronic cryptic acceptor site    |
| <i>SLC26A4</i> | c.1264-3C>G    | 0.9999                                        | 0.966                                        | Broken WT Acceptor Site                                            |
| <i>TECTA</i>   | c.6162+5 G>A   | 0.99996671                                    | 0.996                                        | Broken WT Donor Site                                               |
| <i>TMC1</i>    | c.1224+2T>C    | 0.9703                                        | 0.602                                        | Broken WT Donor Site                                               |
| <i>TMPRSS3</i> | c.783-1G>T     | 0.9999                                        | 0.942                                        | not available                                                      |

(1)>0.6 is predicted splice altering, (2) <http://www.umd.be/HSF3/>

**Supp. Table S3.** Novel and reported variants in this study of known genes associated with autosomal recessive hearing loss segregating in compound heterozygosity.

| Family                 | Gene                | Allele                                  | Allele frequency |        |               | Gene                 | Allele                                   | Allele frequency |        |        | Reference                                              |
|------------------------|---------------------|-----------------------------------------|------------------|--------|---------------|----------------------|------------------------------------------|------------------|--------|--------|--------------------------------------------------------|
|                        |                     |                                         | Pak              | 1000G  | ExAC          |                      |                                          | Pak              | 1000G  | ExAC   |                                                        |
| PKDF055                | <i>CDH23</i>        | c.2968G>A,<br>p.(Asp990Asn)             | -                | -      | -             | <i>CDH23</i>         | c.6049+1G>A,<br>Splice error             | -                | -      | -      | Bork, et al., 2001                                     |
| PKDF936                | <i>GJB2</i>         | c.71G>A,<br>p.(Trp24*)                  | -                | 0.0004 | 0.0006        | <i>GJB2</i>          | c.231C>T,<br>p.(Trp77*)                  | -                | 0.0000 | 0.0001 | Santos, et al., 2005b                                  |
| DEM4582                | <i>GJB2</i>         | c.-23+1G>A,<br>Splice error             | -                | -      | 2E-05         | <i>GJB2</i>          | c.71G>A,<br>p.(Trp24*)                   | -                | 0.0004 | 0.0006 | Denoyelle, et al., 1997;Kelsell, et al., 1997          |
| PKDF019A               | <b><i>MYO7A</i></b> | <b>c.20G&gt;T,<br/>p.(Gly7Val)</b>      | 0/170            | -      | 1E-05         | <i>MYO7A</i>         | c.1849T>C,<br>p.(Ser617Pro)              | 0/160            | -      | 5E-05  | This study; Carss, et al., 2017                        |
| PKDF173                | <i>MYO7A</i>        | c.93C>A,<br>p.(Cys31*)                  | -                | 0.017  | 5E-05         | <b><i>MYO7A</i></b>  | <b>c.3728C&gt;G,<br/>p.(Pro1243Arg )</b> | 0/164            | -      | -      | Weston, et al., 1996; this study                       |
| PKDF312                | <i>MYO7A</i>        | c.397dupC,<br>p.(His133Profs*7)         | -                | -      | 0.0006        | <i>MYO7A</i>         | c.3136dupC,<br>p.(Leu1046Profs*9)        | -                | -      | -      | Riazuddin, et al., 2008                                |
| DEM4652 <sup>(†)</sup> | <i>MYO7A</i>        | c.1258A>T,<br>p.(Lys420*)               | -                | -      | 4E-05         | <b><i>MYO7A</i></b>  | <b>c.4505A&gt;G,<br/>p.(Asp1502Gly)</b>  | 0/454            | -      | 2E-05  | Le Quesne Stabej, et al., 2012;this study              |
| DEM4190                | <i>MYO7A</i>        | c.1258A>T,<br>p.(Lys420*)               | -                | -      | 4E-05         | <i>MYO7A</i>         | c.4838delA,<br>p.(Asp1613Valfs*32)       | -                | -      | -      | Le Quesne Stabej, et al., 2012;Riazuddin, et al., 2008 |
| DEM4561                | <b><i>MYO7A</i></b> | <b>c.3364C&gt;A,<br/>p.(Leu1122Ile)</b> | -                | -      | 0.0001<br>506 | <b><i>MYO7A</i></b>  | <b>c.5345G&gt;C,<br/>p.(Gly1782Ala)</b>  | -                | -      | 4E-05  | This study                                             |
| DEM4281,<br>DEM4692    | <i>MYO7A</i>        | c.3502C>T,<br>p.(Arg1168Trp)            | -                | 0.0002 | 0.0001        | <i>MYO7A</i>         | c.4838delA,<br>p.(Asp1613Valfs*32)       | -                | -      | -      | Jaijo, et al., 2006;Riazuddin, et al., 2008            |
| PKDF1693               | <i>MYO15A</i>       | c.4528C>T,<br>p.(Gln1510*)              | -                | -      | 8E-06         | <b><i>MYO15A</i></b> | <b>c.4570C&gt;T,<br/>p.(Gln1524*)</b>    | -                | -      | -      | Rehman, et al., 2015;This study                        |
| DEM4149B               | <i>SLC26A4</i>      | c.71G>T,<br>p.(Arg24Leu)                | -                | -      | -             | <i>SLC26A4</i>       | c.716T>A,<br>p.(Val239Asp)               | -                | 0.0002 | 0.0002 | Prasad, et al., 2004;Park, et al., 2003                |
| DEM4220                | <i>SLC26A4</i>      | c.716T>A,<br>p.(Val239Asp)              | -                | 0.0002 | 0.0002        | <i>SLC26A4</i>       | c.1337A>G,<br>p.(Gln446Arg)              | -                | -      | 8E-05  | Park, et al., 2003;Reardon, et al., 2000               |
| PKDF384b               | <i>SLC26A4</i>      | c.1226G>A,<br>p.(Arg409His)             | -                | -      | 0.0001        | <i>SLC26A4</i>       | c.1229C>T,<br>p.(Thr410Met)              | -                | 0.0002 | 0.0002 | Van Hauwe, et al., 1998;Reardon, et al., 2000          |
| PKDF1452               | <b><i>TECTA</i></b> | <b>c. 2736 C&gt;A,<br/>p.(Cys912*)</b>  | -                | -      | -             | <b><i>TECTA</i></b>  | <b>c.6162+5 G&gt;A<br/>Splice error</b>  | -                | -      | -      | This study                                             |
| PKSR13b                | <b><i>TMC1</i></b>  | <b>c.1143C&gt;G,<br/>p.(Tyr381*)</b>    | 0/166            | -      | -             | <i>TMC1</i>          | c.1810C>T,<br>p.(Arg604*)                | -                | -      | 8E-06  | This study;Sirmaci, et al., 2009                       |
| HL006                  | <b><i>TMC1</i></b>  | <b>c.1259G&gt;A,<br/>p.(Cys420Tyr)</b>  | 0/125            | -      | -             | <i>TMC1</i>          | c.1788C>A,<br>p.(Ser596Arg)              | 0/125            | -      | -      | This study;Imtiaz, et al., 2016                        |

Novel mutations are in bold font. (+) segregates another known mutation *MYO7A* (c.3502C>T, p.Arg1168Trp) (Jaijo, et al., 2006). Pak: Pakistani controls, 1000G: 1000 Genomes Project database, ExAc: Exome Aggregation Consortium database. (-) indicates that the variant is absent presently from the database. (\*) indicates stop codon.

**Supp. Table S4.** Novel and reported mutant variants in known genes associated with autosomal recessive hearing loss in our Pakistani cohort.

| Gene                     | Accession number | Studies                                                | Nb of families | Variant                   | Protein change             |
|--------------------------|------------------|--------------------------------------------------------|----------------|---------------------------|----------------------------|
| <i>ADCY1<sup>t</sup></i> | NM_021116.2      | Santos-Cortez, et al., 2014                            | 1              | c.3112C>T                 | p.(Arg1038*)               |
| <i>ADGRV1</i>            | NM_032119.3      | this study                                             | 1              | <b>c.1055C&gt;T</b>       | <b>p.(Pro352Leu)</b>       |
| <i>BSND</i>              | NM_057176.2      | Riazuddin, et al., 2009                                | 1              | c.10G>T                   | p.(Glu4*)                  |
| <i>BSND</i>              | NM_057176.2      | Riazuddin, et al., 2009; Naz, et al., 2017; this study | 15             | c.35T>C                   | p.(Ile12Thr)               |
| <i>CABP2</i>             | NM_016366.2      | this study                                             | 1              | <b>c.637+1G&gt;T</b>      | <b>Splice error</b>        |
| <i>CDH23<sup>t</sup></i> | NM_022124.5      | Schultz, et al., 2011                                  | 2              | c.778G>A                  | p.(Ala260Thr)              |
| <i>CDH23<sup>t</sup></i> | NM_022124.5      | this study                                             | 1              | <b>c.2866G&gt;A</b>       | <b>p.(Glu956Lys)</b>       |
| <i>CDH23<sup>t</sup></i> | NM_022124.5      | Schultz, et al., 2011; this study                      | 3              | c.2968G>A                 | p.(Asp990Asn)              |
| <i>CDH23<sup>t</sup></i> | NM_022124.5      | this study                                             | 1              | <b>c.3481C&gt;T</b>       | <b>p.(Arg1161*)</b>        |
| <i>CDH23<sup>t</sup></i> | NM_022124.5      | this study                                             | 1              | <b>c.3880C&gt;T</b>       | <b>p.(Gln1294*)</b>        |
| <i>CDH23<sup>t</sup></i> | NM_022124.5      | Schultz, et al., 2011                                  | 1              | c.4267G>A                 | p.(Asp1423Asn)             |
| <i>CDH23<sup>t</sup></i> | NM_022124.5      | Schultz, et al., 2011                                  | 1              | c.4688T>C                 | p.(Leu1563Pro)             |
| <i>CDH23<sup>t</sup></i> | AF312024         | Astuto, et al., 2002                                   | 2              | c.4756G>C                 | p.(Ala1586Pro)             |
| <i>CDH23<sup>t</sup></i> | NM_022124.5      | Schultz, et al., 2011                                  | 1              | c.4829G>T                 | p.(Gly1610Val)             |
| <i>CDH23<sup>t</sup></i> | NM_022124.5      | this study                                             | 1              | <b>c.4892C&gt;T</b>       | <b>p.(Ala1631Val)</b>      |
| <i>CDH23<sup>t</sup></i> | NM_022124.5      | this study                                             | 1              | <b>c.5149T&gt;C</b>       | <b>p.(Cys1717Arg)</b>      |
| <i>CDH23<sup>t</sup></i> | NM_022124.5      | Bork, et al., 2001; this study                         | 2              | c.6049+1G>A               | Splice error               |
| <i>CDH23<sup>t</sup></i> | NM_022124.5      | this study                                             | 1              | <b>c.6050 -9G&gt;A</b>    | <b>Splice error</b>        |
| <i>CDH23<sup>t</sup></i> | NM_022124.5      | this study                                             | 1              | <b>c.6083A&gt;C</b>       | <b>p.(Asp2028Ala)</b>      |
| <i>CDH23<sup>t</sup></i> | NM_022124.5      | Bork, et al., 2001; Schultz, et al., 2011; this study  | 5              | c.6133G>A                 | p.(Asp2045Asn)             |
| <i>CDH23<sup>t</sup></i> | NM_022124.5      | this study                                             | 1              | <b>c.6202A&gt;C</b>       | <b>p.(Thr2068Pro)</b>      |
| <i>CDH23<sup>t</sup></i> | NM_022124.5      | Bork, et al., 2001; Schultz, et al., 2011, this study  | 3              | c.6604G>A                 | p.(Asp2202Asn)             |
| <i>CDH23<sup>t</sup></i> | NM_022124.5      | Naz, et al., 2017, this study                          | 2              | c.7814A>G                 | p.(Asn2605Ser)             |
| <i>CDH23<sup>t</sup></i> | NM_022124.5      | Schultz, et al., 2011, this study                      | 2              | c.7987_7989delTTC         | p.(Phe2664del)             |
| <i>CDH23<sup>t</sup></i> | NM_022124.5      | Schultz, et al., 2011                                  | 1              | c.8113A>G                 | p.(Met2705Val)             |
| <i>CDH23<sup>t</sup></i> | NM_022124.5      | this study                                             | 1              | <b>c.8351_8352insCGAT</b> | <b>p.(Leu2785Aspfs*43)</b> |
| <i>CDH23<sup>t</sup></i> | NM_022124.5      | Schultz, et al., 2011; Shahzad, et al., 2013           | 2              | c.8530C>T                 | p.(Pro2844Ser)             |
| <i>CDH23<sup>t</sup></i> | NM_022124.5      | Schultz, et al., 2011                                  | 1              | c.8531C>T                 | p.(Pro2844Leu)             |

|                           |                |                                                                                               |    |                        |                      |
|---------------------------|----------------|-----------------------------------------------------------------------------------------------|----|------------------------|----------------------|
| <i>CDH23<sup>†</sup></i>  | AY010111       | Bork, et al., 2001                                                                            | 1  | IVS23+1G→A             | Splice error         |
| <i>CDH23<sup>†</sup></i>  | AY010111       | Bork, et al., 2001                                                                            | 1  |                        | p.(Asp188Asn)        |
| <i>CDH23<sup>†</sup></i>  | AY010111       | Bork, et al., 2001                                                                            | 1  |                        | p.(Gln492*)          |
| <i>CIB2<sup>†</sup></i>   | NM_006383.3    | Riazuddin, et al., 2012                                                                       | 1  | c.192G>C               | p.(Glu64Asp)         |
| <i>CIB2<sup>†</sup></i>   | NM_006383.3    | Riazuddin, et al., 2012;<br>Rehman, et al., 2015; Seco, et al., 2016; this study              | 71 | c.272T>C               | p.(Phe91Ser)         |
| <i>CIB2<sup>†</sup></i>   | NM_006383.3    | Riazuddin, et al., 2012; this study                                                           | 3  | c.297C>G               | p.(Cys99Trp)         |
| <i>CLCNKA</i>             | NM_004070.3    | this study                                                                                    | 1  | <b>c.1985G&gt;T</b>    | <b>p.(Gly662Val)</b> |
| <i>CLDN14<sup>†</sup></i> | NM_001146077.1 | Lee, et al., 2012a                                                                            | 1  | c.167G>A               | p.(Trp56*)           |
| <i>CLDN14<sup>†</sup></i> | NM_001146077.1 | Lee, et al., 2012a                                                                            | 1  | c.242G>A               | p.(Arg81His)         |
| <i>CLDN14<sup>†</sup></i> | NM_012130      | Wilcox, et al., 2001; Lee, et al., 2012a; Faridi, et al., 2017; Naz, et al., 2017; this study | 10 | c.254T>A               | p.(Val85Asp)         |
| <i>CLDN14<sup>†</sup></i> | NM_012130      | Wilcox, et al., 2001                                                                          | 1  | c.398delT              | p.(Met133Argfs*24)   |
| <i>CLDN14<sup>†</sup></i> | NM_001146077.1 | Lee, et al., 2012a                                                                            | 1  | c.694G>A               | p.(Gly232Arg)        |
| <i>EDNRB</i>              | NM_000115.3    | this study                                                                                    | 1  | <b>c.553G&gt;A</b>     | <b>p.(Val185Met)</b> |
| <i>ELMOD3<sup>†</sup></i> | NM_032213.4    | Jaworek, et al., 2013                                                                         | 1  | c.794T>C               | p.(Leu265Ser)        |
| <i>EPS8</i>               | NM_004447.5    | this study                                                                                    | 1  | <b>c.205-8A&gt;G</b>   | <b>Splice error</b>  |
| <i>ESPN<sup>†</sup></i>   | NM_031475.2    | Naz, et al., 2004                                                                             | 1  | c.1988_1991delAGAG     | p.(Lys663Thrfs*2)    |
| <i>ESPN<sup>†</sup></i>   | NM_031475.2    | Naz, et al., 2017                                                                             | 1  | c.2019dupG             | p.(Leu674Alafs*72)   |
| <i>ESPN<sup>†</sup></i>   | NM_031475.2    | Naz, et al., 2004                                                                             | 1  | c.2470_2473del         | p.(Ser824Argfs*22)   |
| <i>ESPN<sup>†</sup></i>   | NM_031475.2    | this study                                                                                    | 1  | <b>c.2496_2496delC</b> | <b>p.(Tyr832*)</b>   |
| <i>ESRRB<sup>†</sup></i>  | NM_004452.3    | Collin, et al., 2008                                                                          | 1  | c.329C>T               | p.(Ala110Val)        |
| <i>ESRRB<sup>†</sup></i>  | NM_004452.3    | this study                                                                                    | 1  | <b>c.536G&gt;A</b>     | <b>p.(Arg179His)</b> |
| <i>ESRRB<sup>†</sup></i>  | NM_004452.3    | Collin, et al., 2008                                                                          | 1  | c.959T>C               | p.(Leu320Pro)        |
| <i>ESRRB<sup>†</sup></i>  | NM_004452.3    | Lee, et al., 2011b                                                                            | 1  | c.1018_1020delGAG      | p.(Glu340del)        |
| <i>ESRRB<sup>†</sup></i>  | NM_004452.3    | Collin, et al., 2008                                                                          | 1  | c.1024G>T              | p.(Val342Leu)        |
| <i>ESRRB<sup>†</sup></i>  | NM_004452.3    | Collin, et al., 2008                                                                          | 1  | c.1040T<C              | p.(Leu347Pro)        |
| <i>GAB1<sup>†</sup></i>   | NM_207123      | Yousaf, et al., 2018a                                                                         | 1  | c.347G>A               | p.(Gly116Glu)        |
| <i>GIPC3<sup>†</sup></i>  | NM_133261.2    | Rehman, et al., 2011                                                                          | 1  | c.264G>A               | p.(Met88Ile )        |
| <i>GIPC3<sup>†</sup></i>  | NM_133261.2    | Rehman, et al., 2011                                                                          | 1  | c.281G>A               | p.(Gly94Asp)         |
| <i>GIPC3<sup>†</sup></i>  | NM_133261.2    | Rehman, et al., 2011                                                                          | 1  | c.565C>T               | p.(Gly46Arg)         |
| <i>GIPC3<sup>†</sup></i>  | NM_133261.2    | Rehman, et al., 2011; Naz, et al., 2017; this study                                           | 5  | c.662C>T               | p.(Thr221Ile)        |

|                           |                |                                                                            |    |                                  |                           |
|---------------------------|----------------|----------------------------------------------------------------------------|----|----------------------------------|---------------------------|
| <i>GIPC3<sup>†</sup></i>  | NM_133261.2    | Rehman, et al., 2011                                                       | 1  | c.685dupG                        | p.(Ala229Glyfs*10)        |
| <i>GIPC3<sup>†</sup></i>  | NM_133261.2    | Rehman, et al., 2011                                                       | 1  | c.767G>A                         | p.(Gly256Asp)             |
| <i>GJB2</i>               | NM_004004.5    | Rehman, et al., 2015                                                       | 1  | 131-kb deletion                  | 131-kb deletion           |
| <i>GJB2</i>               | NM_004004.5    | this study                                                                 | 2  | <b>c.-23+1G&gt;A</b>             | <b>Splice error</b>       |
| <i>GJB2</i>               | NM_004004.5    | Santos, et al., 2005b; Rehman, et al., 2015; this study                    | 10 | c.35delG                         | p.(Gly12Valfs*2)          |
| <i>GJB2</i>               | NM_004004.5    | Santos, et al., 2005b; Rehman, et al., 2015; Naz, et al., 2017; this study | 36 | c.71G>A                          | p.(Trp24*)                |
| <i>GJB2</i>               | NM_004004.5    | Santos, et al., 2005b                                                      | 1  | c.95G>A                          | p.(Arg32His)              |
| <i>GJB2</i>               | NM_004004.5    | Santos, et al., 2005b                                                      | 1  | c.167delT                        | p.(Leu56Argfs*26)         |
| <i>GJB2</i>               | NM_004004.5    | this study                                                                 | 1  | <b>c.223C&gt;T</b>               | <b>p.(Arg75Trp)</b>       |
| <i>GJB2</i>               | NM_004004.5    | this study                                                                 | 2  | <b>c.224G&gt;A</b>               | <b>p.(Arg75Gln)</b>       |
| <i>GJB2</i>               | NM_004004.5    | Santos, et al., 2005b; Rehman, et al., 2015; Naz, et al., 2017; this study | 28 | c.231G>A                         | p.(Trp77*)                |
| <i>GJB2</i>               | NM_004004.5    | this study                                                                 | 1  | <b>c.355G&gt;T</b>               | <b>p.(Glu119*)</b>        |
| <i>GJB2</i>               | NM_004004.5    | Santos, et al., 2005b; Naz, et al., 2017                                   | 2  | c.358_360 del                    | p.(Glu120del)             |
| <i>GJB2</i>               | NM_004004.5    | this study                                                                 | 2  | <b>c.457G&gt;A</b>               | <b>p.(Val153Ile)</b>      |
| <i>GPSM2</i>              | NM_001321039.1 | this study                                                                 | 1  | <b>c.138C&gt;A</b>               | <b>p.(Phe46Leu)</b>       |
| <i>GRXCR1<sup>†</sup></i> | NM_001080476.2 | Schraders, et al., 2010; this study                                        | 2  | c.229C>T                         | p.(Gln77*)                |
| <i>GRXCR1<sup>†</sup></i> | NM_001080476.2 | Schraders, et al., 2010                                                    | 1  | c.412C>T                         | p.(Arg138Cys)             |
| <i>GRXCR1<sup>†</sup></i> | NM_001080476.2 | this study                                                                 | 1  | <b>c.655G&gt;A</b>               | <b>p.(Glu219Lys)</b>      |
| <i>GRXCR2<sup>†</sup></i> | NM_001080516.1 | Naz, et al., 2017                                                          | 1  | c.714dupT                        | p.(Gly239Trpfs*74)        |
| <i>HGF<sup>†</sup></i>    | NM_000601.4    | Schultz, et al., 2009; Rehman, et al., 2015; Naz, et al., 2017; this study | 66 | c.482<br>+1986_88delTGA          | ND                        |
| <i>HGF<sup>†</sup></i>    | NM_000601.4    | Schultz, et al., 2009; this study                                          | 3  | c.482+1991_2000delG<br>ATGATGAAA | ND                        |
| <i>HGF<sup>†</sup></i>    | NM_000601.4    | Schultz, et al., 2009                                                      | 1  | c.495G>A                         | p.(Ser165Ser)             |
| <i>ILDR1</i>              | NM_001199799.1 | Borck, et al., 2011; this study                                            | 2  | c.3G>A                           | p.(Met1Ile)               |
| <i>ILDR1</i>              | NM_001199799.1 | Borck, et al., 2011                                                        | 1  | c.290G>A                         | p.(Arg97Gln)              |
| <i>ILDR1</i>              | NM_001199799.1 | Borck, et al., 2011                                                        | 1  | c.411delG                        | p.(Trp137Cysfs*25)        |
| <i>ILDR1</i>              | NM_001199799.1 | Borck, et al., 2011                                                        | 1  | c.499+1G>A                       | ND                        |
| <i>ILDR1</i>              | NM_175924.3    | this study                                                                 | 1  | <b>c.900delG</b>                 | <b>p.(Thr301Profs*20)</b> |



|                             |                |                                                                                  |    |                         |                           |
|-----------------------------|----------------|----------------------------------------------------------------------------------|----|-------------------------|---------------------------|
| <i>ILDR1</i>                | NM_175924.3    | this study                                                                       | 1  | <b>c.1005_1005delG</b>  | <b>p.(Glu335Aspfs*30)</b> |
| <i>ILDR1</i>                | NM_175924.3    | this study                                                                       | 1  | <b>c.1029_1030delTT</b> | <b>p.(Trp344Glyfs*17)</b> |
| <i>ILDR1</i>                | NM_001199799.1 | Borck, et al., 2011                                                              | 2  | c.1032delG              | p.(Thr345Profs*20)        |
| <i>ILDR1</i>                | NM_001199799.1 | Borck, et al., 2011                                                              | 1  | c.1135G>T               | p.(Glu379*)               |
| <i>ILDR1</i>                | NM_001199799.1 | Borck, et al., 2011                                                              | 1  | c.1180delG              | p.(Glu394Serfs*15)        |
| <i>ILDR1</i>                | NM_001199799.1 | this study                                                                       | 1  | <b>c.1384C&gt;T</b>     | <b>p.(Arg462* )</b>       |
| <i>ILDR1</i>                | NM_001199799.1 | Borck, et al., 2011                                                              | 1  | c.1358G>A               | p.(Arg453Gln)             |
| <i>ILDR1</i>                | NM_001199799.1 | Borck, et al., 2011                                                              | 1  | c.1387C>T               | p.(Arg463Cys)             |
| <i>KARS<sup>†</sup></i>     | NM_001130089.1 | Santos-Cortez, et al., 2013                                                      | 2  | c.571T>C                | p.(Tyr173His)             |
| <i>KARS<sup>†</sup></i>     | NM_001130089.1 | Santos-Cortez, et al., 2013                                                      | 1  | c.1129G>A               | p.(Asp377Asn)             |
| <i>LHFPL5<sup>†</sup></i>   | NM_182548.3    | Shabbir, et al., 2006; Rehman, et al., 2015; this study                          | 4  | c.250delC               | p.(Leu84*)                |
| <i>LHFPL5<sup>†</sup></i>   | NM_182548.3    | this study                                                                       | 1  | <b>c.452G&gt;T</b>      | <b>p.(Gly151Val)</b>      |
| <i>LRTOMT<sup>†</sup></i>   | EU627069       | Ahmed, et al., 2008a                                                             | 1  | c.328G>A                | p.(Glu110Lys)             |
| <i>MARVELD2<sup>†</sup></i> | NM_001038603.2 | Nayak, et al., 2015                                                              | 1  | 8,095 bp deletion       | p.(Cys395-Gln501del)      |
| <i>MARVELD2<sup>†</sup></i> | DQ682656.1     | Riazuddin, et al., 2006a                                                         | 2  | IVS4+2delTGAG           | Splice error              |
| <i>MARVELD2<sup>†</sup></i> | NM_001038603.2 | this study                                                                       | 1  | <b>c.1138C&gt;T</b>     | <b>p.(Gln380*)</b>        |
| <i>MARVELD2<sup>†</sup></i> | DQ682656.1     | Riazuddin, et al., 2006a; Nayak, et al., 2015                                    | 2  | c.1183-1G>A             | Splice error              |
| <i>MARVELD2<sup>†</sup></i> | NM_001038603.2 | this study                                                                       | 1  | <b>c.1223_1224insA</b>  | <b>p.(Glu408Argfs*4)</b>  |
| <i>MARVELD2<sup>†</sup></i> | NM_001038603.2 | Chishti, et al., 2008                                                            | 1  | c.1295+1G>A             | Splice error              |
| <i>MARVELD2<sup>†</sup></i> | NM_001038603.2 | Riazuddin, et al., 2006a; Chishti, et al., 2008; Nayak, et al., 2015; this study | 12 | c.1295+2T>C             | Splice error              |
| <i>MARVELD2<sup>†</sup></i> | DQ682656.1     | Riazuddin, et al., 2006a                                                         | 1  | c.1498C>T               | p.(Arg500*)               |
| <i>MET<sup>†</sup></i>      | NM_000245.2    | Mujtaba, et al., 2015                                                            | 1  | c.2521T>G               | p.(Phe841Val)             |
| <i>MSRB3<sup>†</sup></i>    | NM_001031679.2 | Ahmed, et al., 2011                                                              | 2  | c.55C>T                 | p.(Arg19*)                |
| <i>MSRB3<sup>†</sup></i>    | NM_198080.3    | Ahmed, et al., 2011; this study                                                  | 11 | c.265T>G                | p.(Cys89Gly)              |
| <i>MSRB3<sup>†</sup></i>    | NM_001031679.2 | this study                                                                       | 1  | <b>c.412-1G&gt;A</b>    | <b>Splice error</b>       |
| <i>MYO6<sup>†</sup></i>     | NM_004999.3    | Ahmed, et al., 2003a                                                             | 1  | c.36dupT                | p.(Thr13Tyrfs*20)         |
| <i>MYO6<sup>†</sup></i>     | NM_004999.3    | Ahmed, et al., 2003a                                                             | 1  | c.647A>T                | p.(Glu216Val)             |
| <i>MYO6<sup>†</sup></i>     | NM_004999.3    | Naz, et al., 2017                                                                | 1  | c.1729_1741del          | p.(Phe577Ilefs*28)        |
| <i>MYO6<sup>†</sup></i>     | NM_004999.3    | Ahmed, et al., 2003a                                                             | 1  | c.3496C>T               | p.(Arg1166*)              |
| <i>MYO7A</i>                | NM_000260.3    | this study                                                                       | 1  | <b>c.20G&gt;T</b>       | <b>p.(Gly7Val)</b>        |
| <i>MYO7A</i>                | NM_000260.3    | this study                                                                       | 1  | <b>c.93C&gt;A</b>       | <b>p.(Cys31*)</b>         |
| <i>MYO7A</i>                | NM_000260.3    | this study                                                                       | 1  | <b>c.247C&gt;A</b>      | <b>p.(Arg83Ser)</b>       |

|       |             |                                                               |   |                     |                           |
|-------|-------------|---------------------------------------------------------------|---|---------------------|---------------------------|
| MYO7A | NM_000260.3 | Riazuddin, et al., 2008                                       | 1 | c.252C>G            | p.(Asn84Lys)              |
| MYO7A | NM_000260.3 | Riazuddin, et al., 2008;<br>Rehman, et al., 2015; this study  | 3 | c.397dupC           | p.(His133Profs*7)         |
| MYO7A | NM_000260.3 | Shahzad, et al., 2013                                         | 1 | c.398A>C            | p.(His133Pro)             |
| MYO7A | NM_000260.3 | Riazuddin, et al., 2008                                       | 1 | c.471-1G>A          | Frame shift               |
| MYO7A | NM_000260.3 | Riazuddin, et al., 2008;<br>Shahzad, et al., 2013; this study | 6 | c.496delG           | p.(Glu166Argfs*5)         |
| MYO7A | NM_000260.3 | Riazuddin, et al., 2008                                       | 2 | c.640G>A            | p.(Gly214Arg)             |
| MYO7A | NM_000260.3 | Shahzad, et al., 2013                                         | 3 | c.721C>T            | p.(Arg241Cys)             |
| MYO7A | NM_000260.3 | Shahzad, et al., 2013; this study                             | 4 | c.722G>A            | p.(Arg241His)             |
| MYO7A | NM_000260.3 | Riazuddin, et al., 2008; this study                           | 2 | c.977T>A            | p.(Leu326Gln)             |
| MYO7A | NM_000260.3 | Shahzad, et al., 2013; Naz, et al., 2017; this study          | 4 | c.1183C>T           | p.(Arg395Cys)             |
| MYO7A | NM_000260.3 | Shahzad, et al., 2013; this study                             | 6 | c.1258A>T           | p.(Lys420*)               |
| MYO7A | NM_000260.3 | Shahzad, et al., 2013                                         | 1 | c.1300G>C           | p.(Gly434Arg)             |
| MYO7A | NM_000260.3 | Riazuddin, et al., 2008                                       | 2 | c.1309G>A           | p.(Asp437Asn)             |
| MYO7A | NM_000260.3 | Shahzad, et al., 2013                                         | 1 | c.1355T>C           | p.(Leu452Pro)             |
| MYO7A | NM_000260.3 | Riazuddin, et al., 2008; this study                           | 2 | c.1591C>T           | p.(Gln531*)               |
| MYO7A | NM_000260.3 | this study                                                    | 1 | <b>c.1849T&gt;C</b> | <b>p.(Ser617Pro)</b>      |
| MYO7A | NM_000260.3 | Riazuddin, et al., 2008                                       | 1 | c.1935+1G>A         | Splice error              |
| MYO7A | NM_000260.3 | this study                                                    | 1 | <b>c.2339delG</b>   | <b>p.(Gly780Valfs*10)</b> |
| MYO7A | NM_000260.3 | Shahzad, et al., 2013                                         | 1 | c.2367+1G>A         | ND                        |
| MYO7A | NM_000260.3 | Riazuddin, et al., 2008;<br>Shahzad, et al., 2013             | 1 | c.2476G>A           | p.(Ala826Thr)             |
| MYO7A | NM_000260.3 | Shahzad, et al., 2013                                         | 1 | c.2513G>A           | p.(Trp838*)               |
| MYO7A | NM_000260.3 | Shahzad, et al., 2013                                         | 1 | c.2695-9A>G         | ND                        |
| MYO7A | AY821853.1  | Riazuddin, et al., 2008                                       | 1 | c.2914C>T           | p.(Arg972*)               |
| MYO7A | NM_000260.3 | Riazuddin, et al., 2008; this study                           | 2 | c.3136dupC          | p.(Leu1046Profs*9)        |
| MYO7A | NM_000260.3 | this study                                                    | 1 | <b>c.3364C&gt;A</b> | <b>p.(Leu1122Ile)</b>     |
| MYO7A | NM_000260.3 | this study                                                    | 4 | <b>c.3502C&gt;T</b> | <b>p.(Arg1168Trp)</b>     |
| MYO7A | NM_000260.3 | Shahzad, et al., 2013                                         | 1 | c.3504-1G>C         | Splice error              |
| MYO7A | NM_000260.3 | Riazuddin, et al., 2008; this study                           | 3 | c.3508G>A           | p.(Glu1170Lys)            |
| MYO7A | NM_000260.3 | this study                                                    | 1 | <b>c.3590T&gt;C</b> | <b>p.(Leu1197Pro)</b>     |

|        |             |                                                               |   |                       |                       |
|--------|-------------|---------------------------------------------------------------|---|-----------------------|-----------------------|
| MYO7A  | NM_000260.3 | Riazuddin, et al., 2008                                       | 1 | c.3631delT            | p.(Tyr1211fs*21)      |
| MYO7A  | NM_000260.3 | this study                                                    | 1 | <b>c.3728C&gt;G</b>   | <b>p.(Pro1243Arg)</b> |
| MYO7A  | NM_000260.3 | Shahzad, et al., 2013                                         | 1 | c.3904delT            | p.(Tyr1302Thrfs*97)   |
| MYO7A  | NM_000260.3 | this study                                                    | 1 | <b>c.4505A&gt;G</b>   | <b>p.(Asp1502Gly)</b> |
| MYO7A  | NM_000260.3 | Riazuddin, et al., 2008;<br>Shahzad, et al., 2013; this study | 8 | c.4838delA            | p.(Asp1613Valfs*32)   |
| MYO7A  | NM_000260.3 | Shahzad, et al., 2013                                         | 1 | c.4911_4912insAT      | p.(Asp1638Metfs*8)    |
| MYO7A  | NM_000260.3 | Riazuddin, et al., 2008                                       | 1 | c.5146_5148delGAG     | p.(Glu1716 del)       |
| MYO7A  | NM_000260.3 | Shahzad, et al., 2013                                         | 1 | c.5168G>C             | p.(Arg1723Thr)        |
| MYO7A  | NM_000260.3 | Shahzad, et al., 2013                                         | 1 | c.5177C>T             | p.(Pro1726Leu)        |
| MYO7A  | NM_000260.3 | this study                                                    | 1 | <b>c.5326+3A&gt;G</b> | <b>Splice error</b>   |
| MYO7A  | NM_000260.3 | this study                                                    | 1 | <b>c.5345G&gt;C</b>   | <b>p.(Gly1782Ala)</b> |
| MYO7A  | NM_000260.3 | Riazuddin, et al., 2008                                       | 1 | c.5366+1G>A           | Splice error          |
| MYO7A  | NM_000260.3 | this study                                                    | 1 | <b>c.5434G&gt;A</b>   | <b>p.(Glu1812Lys)</b> |
| MYO7A  | NM_000260.3 | this study                                                    | 1 | <b>c.5522C&gt;G</b>   | <b>p.(Thr1841Arg)</b> |
| MYO7A  | NM_000260.3 | this study                                                    | 1 | <b>c.5660C&gt;T</b>   | <b>p.(Pro1887Leu)</b> |
| MYO7A  | NM_000260.3 | this study                                                    | 1 | <b>c.5856+5G&gt;C</b> | <b>Splice error</b>   |
| MYO7A  | NM_000260.3 | Shahzad, et al., 2013                                         | 1 | c.5899C>T             | p.(Arg1967*)          |
| MYO7A  | NM_000260.3 | Riazuddin, et al., 2008                                       | 2 | c.5944G>A             | p.(Gly1982Arg)        |
| MYO7A  | NM_000260.3 | Shahzad, et al., 2013                                         | 1 | c.6354+1G>A           | Splice error          |
| MYO7A  | NM_000260.3 | Shahzad, et al., 2013; Naz, et al., 2017                      | 2 | c.6354G>C             | p.(Lys2118Asn)        |
| MYO7A  | NM_000260.3 | Shahzad, et al., 2013                                         | 1 | c.6487G>A             | p.(Gly2163Ser)        |
| MYO15A | NM_016239.3 | Rehman, et al., 2016                                          | 1 | c.742C>G              | p.(Arg248Gly)         |
| MYO15A | NM_016239.3 | Naz, et al., 2017                                             | 1 | c.1185dupC            | p.(Glu396Argfs*36)    |
| MYO15A | NM_016239.3 | Naz, et al., 2017                                             | 1 | c.1657delC            | p.(Arg553Glyfs*76)    |
| MYO15A | NM_016239.3 | Naz, et al., 2017; this study                                 | 2 | c.2456C>A             | p.(Ser819*)           |
| MYO15A | NM_016239.3 | Nal, et al., 2007                                             | 1 | c.3313G>T             | p.(Glu1105*)          |
| MYO15A | NM_016239.3 | Nal, et al., 2007                                             | 1 | c.3336delG            | p.(Arg1113Valfs*12)   |
| MYO15A | NM_016239.3 | Liburd, et al., 2001; Rehman, et al., 2016                    | 2 | c.3685C>T             | p.(Gln1229*)          |
| MYO15A | NM_016239.3 | Liburd, et al., 2001                                          | 1 | c.3756+1G>T           | Splice error          |
| MYO15A | NM_016239.3 | this study                                                    | 1 | <b>c.3505C&gt;T</b>   | <b>p.(Arg1169*)</b>   |
| MYO15A | NM_016239.3 | Nal, et al., 2007; Naz, et al., 2017                          | 2 | c.3866+1G>A           | Splice error          |
| MYO15A | NM_016239.3 | Rehman, et al., 2016                                          | 1 | c.3932T>C             | p.(Ile1311Thr)        |

|                    |             |                                            |   |                                                 |                                            |
|--------------------|-------------|--------------------------------------------|---|-------------------------------------------------|--------------------------------------------|
| MYO15A             | NM_016239.3 | Rehman, et al., 2016                       | 1 | c.3944G>A                                       | p.(Gly1315Glu)                             |
| MYO15A             | NM_016239.3 | Rehman, et al., 2016                       | 1 | c.4108C>T                                       | p.(Arg1370Cys)                             |
| MYO15A             | NM_016239.3 | Nal, et al., 2007                          | 1 | c.4176C>A                                       | p.(Tyr1392*)                               |
| MYO15A             | NM_016239.3 | Rehman, et al., 2016; this study           | 2 | c.4528C>T                                       | p.(Gln1510*)                               |
| MYO15A             | NM_016239.3 | this study                                 | 1 | <b>c.4570C&gt;T</b>                             | <b>p.(Gln1524*)</b>                        |
| MYO15A             | NM_016239.3 | Nal, et al., 2007                          | 1 | c.4669A>G                                       | p.(Lys1557Glu)                             |
| MYO15A             | NM_016239.3 | Rehman, et al., 2016                       | 1 | c.4780G>C                                       | p.(Asp1594His)                             |
| MYO15A             | NM_016239.3 | Rehman, et al., 2016                       | 1 | c.4898T>C                                       | p.(Ile1633Thr)                             |
| MYO15A             | NM_016239.3 | this study                                 | 1 | <b>c.5005C&gt;T</b>                             | <b>p.(Gln1669*)</b>                        |
| MYO15A             | NM_016239.3 | Nal, et al., 2007                          | 1 | c.5117_5118delGCins<br>TT                       | p.(Gly1706Val)                             |
| MYO15A             | NM_016239.3 | Nal, et al., 2007                          | 1 | c.5189T>C                                       | p.(Leu1730Pro)                             |
| MYO15A             | NM_016239.3 | Rehman, et al., 2016                       | 1 | c.5335delC                                      | p.(Leu1779Trpfs*18)                        |
| MYO15A             | NM_016239.3 | Rehman, et al., 2016                       | 1 | c.5809C>T                                       | p.(Arg1937Cys)                             |
| MYO15A             | NM_016239.3 | Nal, et al., 2007                          | 1 | c.6061C>T                                       | p.(Gln2021*)                               |
| MYO15A             | NM_016239.3 | Rehman, et al., 2016                       | 1 | c.6146C>A                                       | p.(Pro2049His)                             |
| MYO15A             | NM_016239.3 | Rehman, et al., 2016                       | 1 | c.6178-2A>G                                     | Splice error                               |
| MYO15A             | NM_016239.3 | Nal, et al., 2007; Rehman, et al.,<br>2016 | 2 | c.6589C>T                                       | p.(Gln2197*)                               |
| MYO15A             | NM_016239.3 | Nal, et al., 2007                          | 1 | c.6731G>A                                       | p.(Gly2244Glu)                             |
| MYO15A             | NM_016239.3 | Nal, et al., 2007                          | 1 | c.6796G>A                                       | p.(Val2266Met)                             |
| MYO15A             | NM_016239.3 | Rehman, et al., 2016                       | 1 | c.6944delG                                      | p.(Gly2315Glufs*102)                       |
| MYO15A             | NM_016239.3 | Liburd, et al., 2001                       | 1 | c.8148G>T                                       | p.(Gln2716His)                             |
| MYO15A             | NM_016239.3 | Naz, et al., 2017                          | 1 | c.8158G>A                                       | p.(Asp2720Asn)                             |
| MYO15A             | NM_016239.3 | Nal, et al., 2007                          | 4 | c.8158G>C                                       | p.(Asp2720His)                             |
| MYO15A             | NM_016239.3 | Rehman, et al., 2016; this study           | 2 | c.8224+3A>G                                     | Splice error                               |
| MYO15A             | NM_016239.3 | Nal, et al., 2007                          | 1 | c.8821_8822insTG                                | p.(Gly2941Valfs*94)                        |
| MYO15A             | NM_016239.3 | Rehman, et al., 2016                       | 1 | c.9229+2T>C                                     | Splice error                               |
| MYO15A             | NM_016239.3 | Nal, et al., 2007                          | 1 | c.9478C>T                                       | p.(Leu3160Phe)                             |
| MYO15A             | NM_016239.3 | Rehman, et al., 2016                       | 1 | c.10208_10209delAGi<br>nsACCAGGCCCGTG<br>CAGCTC | p.(Gln3403delinsProThr<br>ArgProValGlnLeu) |
| MYO15A             | NM_016239.3 | Nal, et al., 2007                          | 1 | c.10474C>T                                      | p.(Gln3492*)                               |
| MYO15A             | NM_016239.3 | Rehman, et al., 2016                       | 1 | c.10572dupC                                     | p.(Ser3525Glnfs*79)                        |
| NARS2 <sup>†</sup> | NM_024678.5 | Simon, et al., 2015                        | 1 | c.637G>T                                        | p.(Val213Phe)                              |
| OTOA               | NM_170664.2 | this study                                 | 1 | <b>c.1148C&gt;T</b>                             | <b>p.(Ala383Val)</b>                       |

|                           |                |                                                        |   |                       |                              |
|---------------------------|----------------|--------------------------------------------------------|---|-----------------------|------------------------------|
| <i>OTOA</i>               | NM_144672.3    | Lee, et al., 2013; this study                          | 2 | c.1352G>A             | p.(Gly451Asp)                |
| <i>OTOA</i>               | NM_144672.3    | Lee, et al., 2013                                      | 2 | c.1879C>T             | p.(Pro627Ser)                |
| <i>OTOF</i>               | NM_194248.2    | Choi, et al., 2009                                     | 1 | c.1103_1104delinsC    | p.(Gly368Alafs*2)            |
| <i>OTOF</i>               | NM_194248.2    | Choi, et al., 2009                                     | 1 | c.1273C>T             | p.(Arg425*)                  |
| <i>OTOF</i>               | NM_194248.2    | this study                                             | 2 | <b>c.1550T&gt;C</b>   | <b>p.(Leu517Pro)</b>         |
| <i>OTOF</i>               | NM_194248.2    | Choi, et al., 2009                                     | 1 | c.1607G>A             | p.(Trp536*)                  |
| <i>OTOF</i>               | NM_194248.2    | Choi, et al., 2009                                     | 1 | c.1718T>G             | p.(Leu573Arg)                |
| <i>OTOF</i>               | NM_194248.2    | this study                                             | 1 | <b>c.1904T&gt;A</b>   | <b>p.(Val635Asp)</b>         |
| <i>OTOF</i>               | NM_194248.2    | Choi, et al., 2009; this study                         | 3 | c.2122C>T             | p.(Arg708*)                  |
| <i>OTOF</i>               | NM_194248.2    | Choi, et al., 2009                                     | 1 | c.2295_2297del        | p.(Glu766del)                |
| <i>OTOF</i>               | NM_004802.3    | Choi, et al., 2009; this study                         | 2 | c.2508C>A             | p.(Tyr836*)                  |
| <i>OTOF</i>               | NM_004802.3    | Choi, et al., 2009; this study                         | 3 | c.2896G>A             | p.(Glu966Lys)                |
| <i>OTOF</i>               | NM_194248.2    | Naz, et al., 2017; this study                          | 2 | c.2965_2967del        | p.(Phe989del)                |
| <i>OTOF</i>               | NM_194248.2    | Choi, et al., 2009                                     | 1 | c.3269C>A             | p.(Ala1090Glu)               |
| <i>OTOF</i>               | NM_194248.2    | Naz, et al., 2017                                      | 1 | c.3289-1G>T           | Splice error                 |
| <i>OTOF</i>               | NM_194248.2    | this study                                             | 1 | <b>c.3376dupA</b>     | <b>p.(Ile1126Asnfs*51)</b>   |
| <i>OTOF</i>               | NM_194323.2    | this study                                             | 1 | <b>c.3514C&gt;T</b>   | <b>p.(Arg1172Trp)</b>        |
| <i>OTOF</i>               | NM_194248.2    | this study                                             | 1 | <b>c.4799+1G&gt;A</b> | <b>Splice error</b>          |
| <i>OTOF</i>               | NM_194248.2    | Naz, et al., 2017                                      | 1 | c.4805G>T             | p.(Gly1602Val)               |
| <i>OTOF</i>               | NM_194248.2    | Choi, et al., 2009                                     | 1 | c.5567G>A             | p.(Arg1856Gln)               |
| <i>OTOF</i>               | NM_194248.2    | this study                                             | 1 | <b>c.5714G&gt;T</b>   | <b>p.(Gly1905Val)</b>        |
| <i>OTOF</i>               | NM_194248.2    | Choi, et al., 2009                                     | 1 | c.5815C>T             | p.(Arg1939Trp)               |
| <i>OTOG</i>               | NM_001277269.1 | this study                                             | 1 | <b>c.7235delG</b>     | <b>p.( Cys2412Serfs*150)</b> |
| <i>PCDH15<sup>†</sup></i> | NM_001142771.1 | Ahmed, et al., 2001; Ahmed, et al., 2008b              | 2 | c.7C>T                | p.(Arg3*)                    |
| <i>PCDH15<sup>†</sup></i> | NM_001142771.1 | Ahmed, et al., 2003b; Ahmed, et al., 2008b; this study | 3 | c.400C>G              | p.(Arg134Gly)                |
| <i>PCDH15<sup>†</sup></i> | NM_001142771.1 | Ahmed, et al., 2008b                                   | 1 | c.533A>G              | p.(Asp178Gly)                |
| <i>PCDH15<sup>†</sup></i> | NM_001142771.1 | Ahmed, et al., 2003b                                   | 1 | c.785G>A              | p.(Gly262Asp)                |
| <i>PCDH15<sup>†</sup></i> | NM_001142772.1 | this study                                             | 1 | <b>c.788C&gt;A</b>    | <b>p.(Pro263Gln)</b>         |
| <i>PCDH15<sup>†</sup></i> | NM_001142771.1 | this study                                             | 1 | <b>c.1737C&gt;A</b>   | <b>p.(Tyr584*)</b>           |
| <i>PCDH15<sup>†</sup></i> | NM_001142771.1 | Ahmed, et al., 2003b                                   | 1 | c.1927C>T             | p.(Arg643*)                  |
| <i>PCDH15<sup>†</sup></i> | NM_001142771.1 | Ahmed, et al., 2008b                                   | 1 | c.1940C>G             | p.(Ser647*)                  |
| <i>PCDH15<sup>†</sup></i> | NM_001142771.1 | Ahmed, et al., 2008b                                   | 1 | c.2052C>A             | p.(Tyr684*)                  |
| <i>PCDH15<sup>†</sup></i> | NM_001142771.1 | Ahmed, et al., 2008b                                   | 1 | c.2483delT            | p.( Glu829Lysfs*13)          |

|                             |                |                                           |   |                                    |                           |
|-----------------------------|----------------|-------------------------------------------|---|------------------------------------|---------------------------|
| <i>PCDH15</i> <sup>†</sup>  | NM_001142771.1 | Ahmed, et al., 2008b                      | 1 | c.3717+1G>T                        | Splice error              |
| <i>PCDH15</i> <sup>†</sup>  | NM_001142771.1 | Ahmed, et al., 2001                       | 1 | c.3718-2A>6                        | Splice error              |
| <i>PCDH15</i> <sup>†</sup>  | NM_001142771.1 | Ahmed, et al., 2008b                      | 1 | c.4257delA                         | p.(Leu1419Phefs*99)       |
| <i>PCDH15</i> <sup>†</sup>  | NM_001142772.1 | this study                                | 1 | <b>deletion of exons 14 and 15</b> | <b>N/A</b>                |
| <i>PJKV</i>                 | NM_001042702.3 | this study                                | 1 | <b>c.158C&gt;G</b>                 | <b>p.(Ser53*)</b>         |
| <i>PJKV</i>                 | NM_001042702.3 | this study                                | 1 | <b>c.162_172del</b>                | <b>p.(Pro55Glu fs*23)</b> |
| <i>PJKV</i>                 | NM_001042702.3 | this study                                | 1 | <b>c.406C&gt;T</b>                 | <b>p.(Arg136*)</b>        |
| <i>PJKV</i>                 | NM_001042702.3 | this study                                | 1 | <b>c.908_910delACA</b>             | <b>p.(Asn303del)</b>      |
| <i>PJKV</i>                 | NM_001042702.3 | Naz, et al., 2017                         | 1 | c.1028G>C                          | p.(Cys343Ser)             |
| <i>POU3F4</i>               | NM_000307.4    | Rehman, et al., 2015                      | 1 | 3.1-Mb deletion                    | 3.1-Mb deletion           |
| <i>POU3F4</i>               | NM_000307.4    | this study                                | 1 | <b>c.478C&gt;T</b>                 | <b>p.(Gln160*)</b>        |
| <i>POU4F3</i>               | NM_002700.2    | this study                                | 1 | <b>c.374C&gt;T</b>                 | <b>p.(Pro125Leu)</b>      |
| <i>PPIP5K2</i> <sup>†</sup> | NM_001276277   | Yousaf, et al., 2018b                     | 2 | c.2510G>A                          | p.(Arg837His)             |
| <i>PTPRQ</i>                | NM_001145026.1 | Naz, et al., 2017                         | 1 | c.189delC                          | p.(Glu65Lysfs*95)         |
| <i>PTPRQ</i>                | NM_001145026.1 | this study                                | 1 | <b>c.5158_5159delIAT</b>           | <b>p.(Ile1720Glnfs*7)</b> |
| <i>PTPRQ</i>                | NM_001145026.1 | this study                                | 1 | <b>c.6739-1G&gt;A</b>              | <b>Splice error</b>       |
| <i>RDX</i> <sup>†</sup>     | NM_001260493.1 | Lee, et al., 2011a                        | 1 | c.1076_1079delTTAA                 | p.(Ile359Lysfs*6)         |
| <i>RDX</i> <sup>†</sup>     | NM_001260493.1 | Khan, et al., 2007                        | 1 | c.1405dupG                         | p.(Ala469Glyfs*19)        |
| <i>RDX</i> <sup>†</sup>     | NM_001260493.1 | Khan, et al., 2007                        | 1 | c.1732G>A                          | p.(Asp578Asn)             |
| <i>S1PR2</i> <sup>†</sup>   | NM_004230.3    | Santos-Cortez, et al., 2016               | 1 | c.323G>C                           | p.(Arg108Pro)             |
| <i>S1PR2</i> <sup>†</sup>   | NM_004230.3    | Santos-Cortez, et al., 2016               | 1 | c.419A>G                           | p.(Tyr140Cys)             |
| <i>SLC26A4</i>              | NM_000441.1    | this study                                | 1 | <b>c.42delC</b>                    | <b>p.(Glu15Serfs*51)</b>  |
| <i>SLC26A4</i>              | NM_000441.1    | Anwar, et al., 2009; this study           | 5 | c.71G>T                            | p.(Arg24Leu)              |
| <i>SLC26A4</i>              | NM_000441.1    | this study                                | 1 | <b>c.154A&gt;T</b>                 | <b>p.(Lys52*)</b>         |
| <i>SLC26A4</i>              | NM_000441.1    | Anwar, et al., 2009; Naz, et al., 2017    | 2 | c.170C>A                           | p.(Ser57*)                |
| <i>SLC26A4</i>              | NM_000441.1    | Anwar, et al., 2009                       | 5 | c.269C>T                           | p.(Ser90Leu)              |
| <i>SLC26A4</i>              | NM_000441.1    | Anwar, et al., 2009                       | 1 | c.304+2T>C                         | p.(Met103Lysfs*4)         |
| <i>SLC26A4</i>              | NM_000441.1    | this study                                | 1 | <b>c.317C&gt;T</b>                 | <b>p.(Ala106Val)</b>      |
| <i>SLC26A4</i>              | NM_000441.1    | this study                                | 1 | <b>c.413T&gt;A</b>                 | <b>p.(Val138Asp)</b>      |
| <i>SLC26A4</i>              | NM_000441.1    | Anwar, et al., 2009; this study           | 2 | c.416G>T                           | p.(Gly139Val)             |
| <i>SLC26A4</i>              | NM_000441.1    | Anwar, et al., 2009; Rehman, et al., 2015 | 2 | c.691G>A                           | p.(Val231Met)             |

|                            |                |                                                                                                 |    |                                 |                           |
|----------------------------|----------------|-------------------------------------------------------------------------------------------------|----|---------------------------------|---------------------------|
| <i>SLC26A4</i>             | NM_000441.1    | Anwar, et al., 2009; Shahzad, et al., 2013; Rehman, et al., 2015; Naz, et al., 2017; this study | 47 | c.716T>A                        | p.(Val239Asp)             |
| <i>SLC26A4</i>             | NM_000441.1    | this study                                                                                      | 3  | <b>c.919-2A&gt;G</b>            | <b>Splice error</b>       |
| <i>SLC26A4</i>             | NM_000441.1    | Naz, et al., 2017                                                                               | 1  | c.965dupA                       | p.(Asn322Lysfs*8)         |
| <i>SLC26A4</i>             | NM_000441.1    | this study                                                                                      | 1  | <b>c.1001G&gt;T</b>             | <b>p.(Gly334Val)</b>      |
| <i>SLC26A4</i>             | NM_000441.1    | Anwar, et al., 2009                                                                             | 1  | c.1115C>T                       | p.(Ala372Val)             |
| <i>SLC26A4</i>             | NM_000441.1    | this study                                                                                      | 1  | <b>c.1198delT</b>               | <b>p.(Cys400Valfs*32)</b> |
| <i>SLC26A4</i>             | NM_000441.1    | this study                                                                                      | 1  | <b>c.1226G&gt;A</b>             | <b>p.(Arg409His)</b>      |
| <i>SLC26A4</i>             | NM_000441.1    | this study                                                                                      | 3  | <b>c.1226G&gt;C</b>             | <b>p.(Arg409Pro)</b>      |
| <i>SLC26A4</i>             | NM_000441.1    | this study                                                                                      | 2  | <b>c.1229C&gt;T</b>             | <b>p.(Thr410Met)</b>      |
| <i>SLC26A4</i>             | NM_000441.1    | this study                                                                                      | 1  | <b>c.1238A&gt;G</b>             | <b>p.(Gln413Arg)</b>      |
| <i>SLC26A4</i>             | NM_000441.1    | this study                                                                                      | 1  | <b>c.1264-3C&gt;G</b>           | <b>Splice error</b>       |
| <i>SLC26A4</i>             | NM_000441.1    | Anwar, et al., 2009                                                                             | 1  | c.1264-477_2090-4927del11202    |                           |
| <i>SLC26A4</i>             | NM_000441.1    | Anwar, et al., 2009; Rehman, et al., 2015; Naz, et al., 2017; this study                        | 24 | c.1337A>G                       | p.(Gln446Arg)             |
| <i>SLC26A4</i>             | AAC51873       | Anwar, et al., 2009                                                                             | 1  | c.1341+3A>C                     | p.(Gly439Valfs*19)        |
| <i>SLC26A4</i>             | AAC51873       | Anwar, et al., 2009                                                                             | 1  | c.1363A>T                       | p.(Ile455Phe)             |
| <i>SLC26A4</i>             | NM_000441.1    | Anwar, et al., 2009; Naz, et al., 2017                                                          | 4  | c.1667A>G                       | p.(Tyr556Cys)             |
| <i>SLC26A4</i>             | NM_000441.1    | Anwar, et al., 2009                                                                             | 1  | c.1692_1693insA                 | p.(Cys565Metfs*9)         |
| <i>SLC26A4</i>             | NM_000441.1    | this study                                                                                      | 6  | <b>c.2106delG</b>               | <b>p.(Lys702Asnfs*19)</b> |
| <i>SLC26A4</i>             | NM_000441.1    | Anwar, et al., 2009                                                                             | 2  | c.2145G>T                       | p.(Lys715Asn)             |
| <i>SLC26A4</i>             | AAC51873       | Anwar, et al., 2009                                                                             | 1  | c.-23177_c.164+1027del24368ins7 |                           |
| <i>TBC1D24<sup>t</sup></i> | NM_001199107.1 | Rehman, et al., 2014                                                                            | 3  | c.208G>T                        | p.(Asp70Tyr)              |
| <i>TBC1D24<sup>t</sup></i> | NM_001199107.1 | Rehman, et al., 2014                                                                            | 1  | c.878G>C                        | p.(Arg293Pro)             |
| <i>TECTA</i>               | NM_005422.2    | Naz, et al., 2017                                                                               | 1  | c.64+2T>C                       | Splice error              |
| <i>TECTA</i>               | NM_005422.2    | this study                                                                                      | 1  | <b>c.840_841insT</b>            | <b>p.(Val281Cysfs*11)</b> |
| <i>TECTA</i>               | NM_005422.2    | this study                                                                                      | 1  | <b>c.1247_1248delGG</b>         | <b>p.(Gly416Aspfs*24)</b> |
| <i>TECTA</i>               | NM_005422.2    | this study                                                                                      | 1  | <b>c.1774G&gt;A</b>             | <b>p.(Val592Met)</b>      |
| <i>TECTA</i>               | NM_005422.2    | this study                                                                                      | 1  | <b>c. 2736 C&gt;A</b>           | <b>p.(Cys912*)</b>        |
| <i>TECTA</i>               | NM_005422.2    | Naz, et al., 2003                                                                               | 1  | c.6037delG                      | p.(Glu2013Argfs*6)        |
| <i>TECTA</i>               | NM_005422.2    | this study                                                                                      | 1  | <b>c.6162+5 G&gt;A</b>          | <b>Splice error</b>       |

|                          |             |                                                                                |    |                                           |                          |
|--------------------------|-------------|--------------------------------------------------------------------------------|----|-------------------------------------------|--------------------------|
| <i>TMC1</i> <sup>†</sup> | NM_138691.2 | Kurima, et al., 2002                                                           | 1  | 27-kb deletion encompassing exons 4 and 5 | ND                       |
| <i>TMC1</i> <sup>†</sup> | NM_138691.2 | Kitajiri, et al., 2007                                                         | 1  | c.16+1G>T                                 | Splice error             |
| <i>TMC1</i> <sup>†</sup> | NM_138691.2 | Kurima, et al., 2002; Kitajiri, et al., 2007; Imtiaz, et al., 2016; this study | 13 | c.100C>T                                  | p.(Arg34*)               |
| <i>TMC1</i> <sup>†</sup> | NM_138691.2 | Kurima, et al., 2002                                                           | 1  | c.298del                                  | p.(Arg100Aspfs*3)        |
| <i>TMC1</i> <sup>†</sup> | NM_138691.2 | Kurima, et al., 2002; Santos, et al., 2005a; Rehman, et al., 2015              | 2  | c.536-8T>A                                | Splice error             |
| <i>TMC1</i> <sup>†</sup> | NM_138691.2 | Imtiaz, et al., 2016; this study                                               | 2  | c.596A>T                                  | p.(Asn199Ile)            |
| <i>TMC1</i> <sup>†</sup> | NM_138691.2 | Santos, et al., 2005a; Rehman, et al., 2015                                    | 1  | c.830A>G                                  | p.(Tyr277Cys)            |
| <i>TMC1</i> <sup>†</sup> | NM_138691.2 | Kurima, et al., 2002                                                           | 1  | c.884+1G>A                                | Splice error             |
| <i>TMC1</i> <sup>†</sup> | NM_138691.2 | this study                                                                     | 1  | <b>c.945G&gt;A</b>                        | <b>p.(Trp315*)</b>       |
| <i>TMC1</i> <sup>†</sup> | NM_138691.2 | Santos, et al., 2005a; Rehman, et al., 2015; this study                        | 4  | c.1114G>A                                 | p.(Val372Met)            |
| <i>TMC1</i> <sup>†</sup> | NM_138691.2 | this study                                                                     | 1  | <b>c.1143C&gt;G</b>                       | <b>p.(Tyr381*)</b>       |
| <i>TMC1</i> <sup>†</sup> | NM_138691.2 | Imtiaz, et al., 2016                                                           | 1  | c.1166G>A                                 | p.(Arg389Gln)            |
| <i>TMC1</i> <sup>†</sup> | NM_138691.2 | this study                                                                     | 1  | <b>c.1209G&gt;A</b>                       | <b>p.(Trp403*)</b>       |
| <i>TMC1</i> <sup>†</sup> | NM_138691.2 | this study                                                                     | 1  | <b>c.1224+2T&gt;C</b>                     | <b>Splice error</b>      |
| <i>TMC1</i> <sup>†</sup> | NM_138691.2 | this study                                                                     | 1  | <b>c.1259G&gt;A</b>                       | <b>p.(Cys420Tyr)</b>     |
| <i>TMC1</i> <sup>†</sup> | NM_138691.2 | Santos, et al., 2005a; Rehman, et al., 2015; this study                        | 2  | c.1333C>T                                 | p.(Arg445Cys)            |
| <i>TMC1</i> <sup>†</sup> | NM_138691.2 | Santos, et al., 2005a; Rehman, et al., 2015                                    | 1  | c.1334G>A                                 | p.(Arg445His)            |
| <i>TMC1</i> <sup>†</sup> | NM_138691.2 | this study                                                                     | 1  | <b>c.1363T&gt;C</b>                       | <b>p.(Tyr455His)</b>     |
| <i>TMC1</i> <sup>†</sup> | NM_138691.2 | Imtiaz, et al., 2016                                                           | 1  | c.1404+1G>T                               | Splice error             |
| <i>TMC1</i> <sup>†</sup> | NM_138691.2 | Kurima, et al., 2002                                                           | 1  | c.1534C>T                                 | p.(Arg512*)              |
| <i>TMC1</i> <sup>†</sup> | NM_138691.2 | Kitajiri, et al., 2007                                                         | 1  | c.1541C>T                                 | p.(Pro514Leu)            |
| <i>TMC1</i> <sup>†</sup> | NM_138691.2 | Kitajiri, et al., 2007; this study                                             | 3  | c.1543T>C                                 | p.(Cys515Arg)            |
| <i>TMC1</i> <sup>†</sup> | NM_138691.2 | this study                                                                     | 1  | <b>c.1728C&gt;G</b>                       | <b>p.(Asn576Lys)</b>     |
| <i>TMC1</i> <sup>†</sup> | NM_138691.2 | this study                                                                     | 1  | <b>c.1753_1754insA</b>                    | <b>p.(Asn407Lysfs*2)</b> |
| <i>TMC1</i> <sup>†</sup> | NM_138691.2 | Imtiaz, et al., 2016; this study                                               | 2  | c.1788C>A                                 | p.(Ser596Arg)            |
| <i>TMC1</i> <sup>†</sup> | NM_138691.2 | this study                                                                     | 1  | <b>c.1810C&gt;T</b>                       | <b>p.(Arg604*)</b>       |
| <i>TMC1</i> <sup>†</sup> | NM_138691.2 | Kurima, et al., 2002                                                           | 1  | c.1960A>G                                 | p.(Met654Val)            |



|                            |                |                                                                                                 |    |                          |                            |
|----------------------------|----------------|-------------------------------------------------------------------------------------------------|----|--------------------------|----------------------------|
| <i>TMC1<sup>t</sup></i>    | NM_138691.2    | Santos, et al., 2005a; Kitajiri, et al., 2007; Rehman, et al., 2015                             | 4  | c.2004T>G                | p.(Ser668Arg)              |
| <i>TMC1<sup>t</sup></i>    | NM_138691.2    | Santos, et al., 2005a; Rehman, et al., 2015; this study                                         | 4  | c.2035G>A                | p.(Glu679Lys)              |
| <i>TMIE<sup>t</sup></i>    | NM_147196.2    | Santos, et al., 2006                                                                            | 1  | c.92A>G                  | p.(Glu31Gly)               |
| <i>TMIE<sup>t</sup></i>    | NM_147196.2    | Naz, et al., 2002                                                                               | 1  | c.94-2_98delAGCCCAGins C | ND                         |
| <i>TMIE<sup>t</sup></i>    | NM_147196.2    | Naz, et al., 2002; Santos, et al., 2006; this study                                             | 4  | c.241C>T                 | p.(Arg81Cys)               |
| <i>TMIE<sup>t</sup></i>    | NM_147196.2    | this study                                                                                      | 1  | <b>c.250C&gt;T</b>       | <b>p.(Arg84Trp)</b>        |
| <i>TMIE<sup>t</sup></i>    | NM_147196.2    | Naz, et al., 2002                                                                               | 1  | c.274C>T                 | p.(Arg92Trp)               |
| <i>TMPRSS3<sup>t</sup></i> | NM_024022.2    | Ahmed, et al., 2004; Lee, et al., 2012b; Naz, et al., 2017                                      | 4  | c.208delC                | p.(His70Thrfs*19)          |
| <i>TMPRSS3<sup>t</sup></i> | NM_024022.2    | this study                                                                                      | 2  | <b>c.271C&gt;T</b>       | <b>p.(Arg91*)</b>          |
| <i>TMPRSS3<sup>t</sup></i> | NM_024022.2    | Lee, et al., 2012b                                                                              | 1  | c.310G>A                 | p.(Glu104Lys)              |
| <i>TMPRSS3<sup>t</sup></i> | NM_024022.2    | Lee, et al., 2012b                                                                              | 1  | c.310G>T                 | p.(Glu104*)                |
| <i>TMPRSS3<sup>t</sup></i> | NM_024022.2    | Naz, et al., 2017; this study                                                                   | 3  | c.323-6G>A               | Splice error               |
| <i>TMPRSS3<sup>t</sup></i> | NM_024022.2    | Ben-Yosef, et al., 2001                                                                         | 1  | c.325C>T                 | p.(Arg109Trp)              |
| <i>TMPRSS3<sup>t</sup></i> | NM_024022.2    | Ben-Yosef, et al., 2001; Ahmed, et al., 2004; this study                                        | 3  | c.581G>T                 | p.(Cys194Phe)              |
| <i>TMPRSS3<sup>t</sup></i> | NM_024022.2    | Lee, et al., 2012b; this study                                                                  | 3  | c.767C>T                 | p.(Ala256Val)              |
| <i>TMPRSS3<sup>t</sup></i> | NM_024022.2    | this study                                                                                      | 1  | <b>c.783-1G&gt;T</b>     | <b>Splice error</b>        |
| <i>TMPRSS3<sup>t</sup></i> | NM_024022.2    | Ben-Yosef, et al., 2001; Ahmed, et al., 2004; Lee, et al., 2012b; Naz, et al., 2017; this study | 18 | c.1219T>C                | p.(Cys407Arg)              |
| <i>TMPRSS3<sup>t</sup></i> | NM_024022.2    | Lee, et al., 2012b                                                                              | 1  | c.1273T>C                | p.(Cys425Arg)              |
| <i>TPRN<sup>t</sup></i>    | NM_001128228.1 | Rehman, et al., 2010                                                                            | 2  | c.42_52del               | p.(Gly15Alafs*150)         |
| <i>TPRN<sup>t</sup></i>    | NM_001128228.1 | Rehman, et al., 2010; Naz, et al., 2017                                                         | 1  | c.44_54dup               | p.(Leu19Glyfs*374)         |
| <i>TPRN<sup>t</sup></i>    | NM_001128228.1 | Rehman, et al., 2010; this study                                                                | 5  | c.1056G>A                | p.(Trp352*)                |
| <i>TPRN<sup>t</sup></i>    | NM_001128228.1 | Rehman, et al., 2010; Naz, et al., 2017                                                         | 1  | c.1244delC               | p.(Pro415Argfs*67)         |
| <i>TRIOBP<sup>t</sup></i>  | NM_001039141.2 | Riazuddin, et al., 2006b                                                                        | 1  | c.1193_1195delAAC        | p.(Gln398del)              |
| <i>TRIOBP<sup>t</sup></i>  | NM_001039141.2 | Riazuddin, et al., 2006b                                                                        | 1  | c.2362C>T                | p.(Arg788*)                |
| <i>TRIOBP<sup>t</sup></i>  | NM_001039141.2 | Naz, et al., 2017                                                                               | 1  | c.2968C>T                | p.(Arg990*)                |
| <i>TRIOBP<sup>t</sup></i>  | NM_001039141.2 | Riazuddin, et al., 2006b                                                                        | 1  | c.3202C>T                | p.(Arg1068*)               |
| <i>TRIOBP<sup>t</sup></i>  | NM_001039141.2 | this study                                                                                      | 1  | <b>c.3460_3461delCT</b>  | <b>p.(Leu1154Alafs*29)</b> |

|                            |                |                                 |   |                                   |                            |
|----------------------------|----------------|---------------------------------|---|-----------------------------------|----------------------------|
| <i>TRIOBP</i> <sup>†</sup> | NM_001039141.2 | this study                      | 1 | <b>c.3634_3646delCTGATCCCCAAG</b> | <b>p.(Leu1212Cysfs*22)</b> |
| <i>USH1C</i>               | NM_005709.3    | Ahmed, et al., 2002; this study | 3 | c.238dup                          | p.(Arg80Profs*69)          |
| <i>USH1C</i>               | NM_005709.3    | this study                      | 1 | <b>c.463C&gt;T</b>                | <b>p.(Arg155*)</b>         |
| <i>USH1C</i>               | NM_005709.3    | Ahmed, et al., 2002             | 1 | c.496+1G>A                        | Splice error               |
| <i>USH1C</i>               | NM_005709.3    | Naz, et al., 2017               | 1 | c.605dupC                         | p.(Gly203Trpfs*47)         |
| <i>USH1C</i>               | NM_005709.3    | Ahmed, et al., 2002             | 1 | c.674+2T>G                        | Splice error               |
| <i>USH1G</i>               | NM_173477.4    | Naz, et al., 2017               | 1 | c.163_164+13del                   | ND                         |
| <i>USH1G</i>               | NM_173477.4    | this study                      | 1 | <b>c.511G&gt;T</b>                | <b>p.(Glu171*)</b>         |
| <i>USH1G</i>               | NM_173477.4    | this study                      | 1 | <b>c.812delC</b>                  | <b>p.(Pro271Argfs*52)</b>  |
| <i>USH2A</i>               | NM_206933.2    | this study                      | 1 | <b>c.3661C&gt;T</b>               | <b>p.(Gln1221*)</b>        |
| <i>WHRN</i>                | NM_015404.3    | this study                      | 1 | <b>c.2388_2389delCG</b>           | <b>p.(Asn796Lysfs*46)</b>  |

Variants identified for the first time in our extended cohort are given in bold. (†) indicates genes associated with non-syndromic autosomal recessive hearing loss that were discovered through studies in Pakistani pedigrees. (\*) indicates stop codon.

**Supp. Table S5.** American College of Medical Genetics (ACMG) classification of the new variants identified in our study.

| <b>Gene</b>     | <b>Variant</b>     | <b>Protein change</b> | <b>ACMG classification</b> |
|-----------------|--------------------|-----------------------|----------------------------|
| <i>ADGRV1</i>   | c.1055C>T          | p.(Pro352Leu)         | Likely pathogenic          |
| <i>CDH23</i>    | c.6083A>C          | p.(Asp2028Ala)        | Likely pathogenic          |
| <i>CDH23</i>    | c.6202A>C          | p.(Thr2068Pro)        | Likely pathogenic          |
| <i>CDH23</i>    | c.8351_8352insCGAT | p.(Leu2785Aspfs*43)   | Pathogenic                 |
| <i>CLCNKA</i>   | c.1985G>T          | p.(Gly662Val)         | Likely pathogenic          |
| <i>EPS8</i>     | c.205-8A>G         | Splice error          | Pathogenic                 |
| <i>ESPN</i>     | c.2496_2496delC    | p.(Tyr832*)           | Pathogenic                 |
| <i>GJB2</i>     | c.355G>T           | p.(Glu119*)           | Pathogenic                 |
| <i>GPSM2</i>    | c.138C>A           | p.(Phe46Leu)          | Likely pathogenic          |
| <i>GRXCR1</i>   | c.655G>A           | p.(Glu219Lys)         | Likely pathogenic          |
| <i>ILDR1</i>    | c.900delG          | p.(Thr301Profs*20)    | Pathogenic                 |
| <i>ILDR1</i>    | c.1005_1005delG    | p.(Glu335Aspfs*30)    | Pathogenic                 |
| <i>ILDR1</i>    | c.1029_1030delTT   | p.(Trp344Glyfs*17)    | Pathogenic                 |
| <i>ILDR1</i>    | c.1384C>T          | p.(Arg462* )          | Pathogenic                 |
| <i>LHFPL5</i>   | c.452 G>T          | p.(Gly151Val)         | Likely pathogenic          |
| <i>MARVELD2</i> | c.1223_1224insA    | p.(Glu408Argfs*4)     | Pathogenic                 |
| <i>MSRB3</i>    | c.412-1G>A         | Splice error          | Pathogenic                 |
| <i>MYO7A</i>    | c.20G>T            | p.(Gly7Val)           | Likely pathogenic          |
| <i>MYO7A</i>    | c.247C>A           | p.(Arg83Ser)          | Likely pathogenic          |
| <i>MYO7A</i>    | c.2339delG         | p.(Gly780Valfs*10)    | Pathogenic                 |
| <i>MYO7A</i>    | c.3364C>A          | p.(Leu1122Ile)        | Likely pathogenic          |
| <i>MYO7A</i>    | c.3590T>C          | p.(Leu1197Pro)        | Likely pathogenic          |
| <i>MYO7A</i>    | c.3728C>G          | p.(Pro1243Arg )       | Likely pathogenic          |
| <i>MYO7A</i>    | c.4505A>G          | p.(Asp1502Gly)        | Likely pathogenic          |

|                |                             |                     |                   |
|----------------|-----------------------------|---------------------|-------------------|
| <i>MYO7A</i>   | c.5326+3A>G                 | Splice error        | Pathogenic        |
| <i>MYO7A</i>   | c.5345G>C                   | p.(Gly1782Ala)      | Likely pathogenic |
| <i>MYO7A</i>   | c.5522C>G                   | p.(Thr1841Arg)      | Likely pathogenic |
| <i>MYO7A</i>   | c.5856+5G>C                 | Splice error        | Pathogenic        |
| <i>MYO15A</i>  | c.3505C>T                   | p.(Arg1169*)        | Pathogenic        |
| <i>MYO15A</i>  | c.4570C>T                   | p.(Gln1524*)        | Pathogenic        |
| <i>MYO15A</i>  | c.5005C>T                   | p.(Gln1669*)        | Pathogenic        |
| <i>OTOF</i>    | c.1550T>C                   | p.(Leu517Pro)       | Likely pathogenic |
| <i>OTOF</i>    | c.1904T>A                   | p.(Val635Asp)       | Likely pathogenic |
| <i>OTOF</i>    | c.3376dupA                  | p.(Ile1126Asnfs*51) | Pathogenic        |
| <i>OTOF</i>    | c.3514C>T                   | p.(Arg1172Trp)      | Likely pathogenic |
| <i>OTOF</i>    | c.4799+1G>A                 | Splice error        | Pathogenic        |
| <i>OTOF</i>    | c.5714G>T                   | p.(Gly1905Val)      | Likely pathogenic |
| <i>OTOG</i>    | c.7235delG                  | p.(Arg2412Hisfs*77) | Pathogenic        |
| <i>PCDH15</i>  | deletion of exons 14 and 15 |                     | Pathogenic        |
| <i>PCDH15</i>  | c.788C>A                    | p.(Pro263Gln)       | Likely pathogenic |
| <i>PJKV</i>    | c.158C>G                    | p.(Ser53*)          | Pathogenic        |
| <i>PJKV</i>    | c.162_172del                | p.(Pro55Glufs*23)   | Pathogenic        |
| <i>PJKV</i>    | c.406C>T                    | p.(Arg136*)         | Pathogenic        |
| <i>PJKV</i>    | c.908_910delACA             | p.(Asn303del)       | Pathogenic        |
| <i>POU3F4</i>  | c.478C>T                    | p.(Gln160*)         | Pathogenic        |
| <i>POU4F3</i>  | c.374C>T                    | p.(Pro125Leu)       | Likely pathogenic |
| <i>PTPRQ</i>   | c.5158_5159delAT            | p.(Ile1720Glnfs*7)  | Pathogenic        |
| <i>PTPRQ</i>   | c.6739-1G>A                 | Splice error        | Pathogenic        |
| <i>SLC26A4</i> | c.42delC                    | p.(Glu15Serfs*51)   | Pathogenic        |
| <i>SLC26A4</i> | c.154A>T                    | p.(Lys52*)          | Pathogenic        |
| <i>SLC26A4</i> | c.317C>T                    | p.(Ala106Val)       | Likely pathogenic |
| <i>SLC26A4</i> | c.1264-3C>G                 | Splice error        | Pathogenic        |
| <i>TECTA</i>   | c.840_841insT               | p.(Val281Cysfs*11)  | Pathogenic        |

|                |                            |                     |                   |
|----------------|----------------------------|---------------------|-------------------|
| <i>TECTA</i>   | c.1247_1248delGG           | p.(Gly416Aspfs*24)  | Pathogenic        |
| <i>TECTA</i>   | c.1774G>A                  | p.(Val592Met)       | Likely pathogenic |
| <i>TECTA</i>   | c.2736 C>A                 | p.(Cys912*)         | Pathogenic        |
| <i>TECTA</i>   | c.6162+5G>A                | Splice error        | Pathogenic        |
| <i>TMC1</i>    | c.945G>A                   | p.(Trp315*)         | Pathogenic        |
| <i>TMC1</i>    | c.1143C>G                  | p.(Tyr381*)         | Pathogenic        |
| <i>TMC1</i>    | c.1209G>A                  | p.(Trp403+)         | Pathogenic        |
| <i>TMC1</i>    | c.1220dup                  | p.(Asn407Lysfs*2)   | Pathogenic        |
| <i>TMC1</i>    | c.1224+2T>C                | Splice error        | Pathogenic        |
| <i>TMC1</i>    | c.1259G>A                  | p.(Cys420Tyr)       | Likely pathogenic |
| <i>TMC1</i>    | c.1728C>G                  | p.(Asn576Lys)       | Likely pathogenic |
| <i>TMPRSS3</i> | c.783-1G>T                 | Splice error        | Pathogenic        |
| <i>TRIOBP</i>  | c.3460_3461delCT           | p.(Leu1154Alafs*29) | Pathogenic        |
| <i>TRIOBP</i>  | c.3634_3646delCTGATCCCCCAA | p.(Leu1212Cysfs*22) | Pathogenic        |
| <i>USH1G</i>   | c.511G>T                   | p.(Glu171*)         | Pathogenic        |
| <i>USH1G</i>   | c.812delC                  | p.(Pro271Argfs*52)  | Pathogenic        |
| <i>USH2A</i>   | c.3661C>T                  | p.(Gln1221*)        | Pathogenic        |
| <i>WHRN</i>    | c.2388_2389delCG           | p.(Asn796Lysfs*46)  | Pathogenic        |

The classification of the new variants was done according to the ACMG guidelines (Richards, et al., 2015).

## References

- Ahmed ZM, Li XC, Powell SD, Riazuddin S, Young TL, Ramzan K, Ahmad Z, Luscombe S, Dhillon K, MacLaren L and others. 2004. Characterization of a new full length TMPRSS3 isoform and identification of mutant alleles responsible for nonsyndromic recessive deafness in Newfoundland and Pakistan. *BMC Med Genet* 5:24.
- Ahmed ZM, Masmoudi S, Kalay E, Belyantseva IA, Mosrati MA, Collin RW, Riazuddin S, Hmani-Aifa M, Venselaar H, Kawar MN and others. 2008a. Mutations of LRTOMT, a fusion gene with alternative reading frames, cause nonsyndromic deafness in humans. *Nat Genet* 40(11):1335-40.
- Ahmed ZM, Morell RJ, Riazuddin S, Gropman A, Shaukat S, Ahmad MM, Mohiddin SA, Fananapazir L, Caruso RC, Husnain T and others. 2003a. Mutations of MYO6 are associated with recessive deafness, DFNB37. *Am J Hum Genet* 72(5):1315-22.
- Ahmed ZM, Riazuddin S, Ahmad J, Bernstein SL, Guo Y, Sabar MF, Sieving P, Riazuddin S, Griffith AJ, Friedman TB and others. 2003b. PCDH15 is expressed in the neurosensory epithelium of the eye and ear and mutant alleles are responsible for both USH1F and DFNB23. *Hum Mol Genet* 12(24):3215-23.
- Ahmed ZM, Riazuddin S, Aye S, Ali RA, Venselaar H, Anwar S, Belyantseva PP, Qasim M, Riazuddin S, Friedman TB. 2008b. Gene structure and mutant alleles of PCDH15: nonsyndromic deafness DFNB23 and type 1 Usher syndrome. *Hum Genet* 124(3):215-23.
- Ahmed ZM, Riazuddin S, Bernstein SL, Ahmed Z, Khan S, Griffith AJ, Morell RJ, Friedman TB, Riazuddin S, Wilcox ER. 2001. Mutations of the protocadherin gene PCDH15 cause Usher syndrome type 1F. *Am J Hum Genet* 69(1):25-34.
- Ahmed ZM, Smith TN, Riazuddin S, Makishima T, Ghosh M, Bokhari S, Menon PS, Deshmukh D, Griffith AJ, Riazuddin S and others. 2002. Nonsyndromic recessive deafness DFNB18 and Usher syndrome type IC are allelic mutations of USH1C. *Hum Genet* 110(6):527-31.
- Ahmed ZM, Yousaf R, Lee BC, Khan SN, Lee S, Lee K, Husnain T, Rehman AU, Bonneux S, Ansar M and others. 2011. Functional null mutations of MSRB3 encoding methionine sulfoxide reductase are associated with human deafness DFNB74. *Am J Hum Genet* 88(1):19-29.
- Anwar S, Riazuddin S, Ahmed ZM, Tasneem S, Ateeq ul J, Khan SY, Griffith AJ, Friedman TB, Riazuddin S. 2009. SLC26A4 mutation spectrum associated with DFNB4 deafness and Pendred's syndrome in Pakistanis. *J Hum Genet* 54(5):266-70.
- Astuto LM, Bork JM, Weston MD, Askew JW, Fields RR, Orten DJ, Ohliger SJ, Riazuddin S, Morell RJ, Khan S and others. 2002. CDH23 mutation and phenotype heterogeneity: a profile of 107 diverse families with Usher syndrome and nonsyndromic deafness. *Am J Hum Genet* 71(2):262-75.
- Ben-Yosef T, Wattenhofer M, Riazuddin S, Ahmed ZM, Scott HS, Kudoh J, Shibuya K, Antonarakis SE, Bonne-Tamir B, Radhakrishna U and others. 2001. Novel mutations of TMPRSS3 in four DFNB8/B10 families segregating congenital autosomal recessive deafness. *J Med Genet* 38(6):396-400.

- Borck G, Ur Rehman A, Lee K, Pogoda HM, Kakar N, von Ameln S, Grillet N, Hildebrand MS, Ahmed ZM, Nurnberg G and others. 2011. Loss-of-function mutations of ILDR1 cause autosomal-recessive hearing impairment DFNB42. *Am J Hum Genet* 88(2):127-37.
- Bork JM, Peters LM, Riazuddin S, Bernstein SL, Ahmed ZM, Ness SL, Polomeno R, Ramesh A, Schloss M, Srisailpathy CR and others. 2001. Usher syndrome 1D and nonsyndromic autosomal recessive deafness DFNB12 are caused by allelic mutations of the novel cadherin-like gene CDH23. *Am J Hum Genet* 68(1):26-37.
- Carss KJ, Arno G, Erwood M, Stephens J, Sanchis-Juan A, Hull S, Megy K, Grozeva D, Dewhurst E, Malka S and others. 2017. Comprehensive Rare Variant Analysis via Whole-Genome Sequencing to Determine the Molecular Pathology of Inherited Retinal Disease. *Am J Hum Genet* 100(1):75-90.
- Chishti MS, Bhatti A, Tamim S, Lee K, McDonald ML, Leal SM, Ahmad W. 2008. Splice-site mutations in the TRIC gene underlie autosomal recessive nonsyndromic hearing impairment in Pakistani families. *J Hum Genet* 53(2):101-5.
- Choi BY, Ahmed ZM, Riazuddin S, Bhinder MA, Shahzad M, Husnain T, Riazuddin S, Griffith AJ, Friedman TB. 2009. Identities and frequencies of mutations of the otoferlin gene (OTOF) causing DFNB9 deafness in Pakistan. *Clin Genet* 75(3):237-43.
- Collin RW, Kalay E, Tariq M, Peters T, van der Zwaag B, Venselaar H, Oostrik J, Lee K, Ahmed ZM, Caylan R and others. 2008. Mutations of ESRRB encoding estrogen-related receptor beta cause autosomal-recessive nonsyndromic hearing impairment DFNB35. *Am J Hum Genet* 82(1):125-38.
- Denoyelle F, Weil D, Maw MA, Wilcox SA, Lench NJ, Allen-Powell DR, Osborn AH, Dahl HH, Middleton A, Houseman MJ and others. 1997. Prelingual deafness: high prevalence of a 30delG mutation in the connexin 26 gene. *Hum Mol Genet* 6(12):2173-7.
- Faridi R, Rehman AU, Morell RJ, Friedman PL, Demain L, Zahra S, Khan AA, Tohlob D, Assir MZ, Beaman G and others. 2017. Mutations of SGO2 and CLDN14 collectively cause coincidental Perrault syndrome. *Clin Genet* 91(2):328-332.
- Imtiaz A, Maqsood A, Rehman AU, Morell RJ, Holt JR, Friedman TB, Naz S. 2016. Recessive mutations of TMC1 associated with moderate to severe hearing loss. *Neurogenetics* 17(2):115-23.
- Jaijo T, Aller E, Oltra S, Beneyto M, Najera C, Ayuso C, Baiget M, Carballo M, Antinolo G, Valverde D and others. 2006. Mutation profile of the MYO7A gene in Spanish patients with Usher syndrome type I. *Hum Mutat* 27(3):290-1.
- Jaworek TJ, Richard EM, Ivanova AA, Giese AP, Choo DI, Khan SN, Riazuddin S, Kahn RA, Riazuddin S. 2013. An alteration in ELMOD3, an Arl2 GTPase-activating protein, is associated with hearing impairment in humans. *PLoS Genet* 9(9):e1003774.
- Kelsell DP, Dunlop J, Stevens HP, Lench NJ, Liang JN, Parry G, Mueller RF, Leigh IM. 1997. Connexin 26 mutations in hereditary non-syndromic sensorineural deafness. *Nature* 387(6628):80-3.
- Khan SY, Ahmed ZM, Shabbir MI, Kitajiri S, Kalsoom S, Tasneem S, Shayiq S, Ramesh A, Srisailpathy S, Khan SN and others. 2007. Mutations of the RDX gene cause nonsyndromic hearing loss at the DFNB24 locus. *Hum Mutat* 28(5):417-23.

- Kitajiri SI, McNamara R, Makishima T, Husnain T, Zafar AU, Kittles RA, Ahmed ZM, Friedman TB, Riazuddin S, Griffith AJ. 2007. Identities, frequencies and origins of TMC1 mutations causing DFNB7/B11 deafness in Pakistan. *Clin Genet* 72(6):546-50.
- Kurima K, Peters LM, Yang Y, Riazuddin S, Ahmed ZM, Naz S, Arnaud D, Drury S, Mo J, Makishima T and others. 2002. Dominant and recessive deafness caused by mutations of a novel gene, TMC1, required for cochlear hair-cell function. *Nat Genet* 30(3):277-84.
- Le Quesne Stabej P, Saihan Z, Rangesh N, Steele-Stallard HB, Ambrose J, Coffey A, Emmerson J, Haralambous E, Hughes Y, Steel KP and others. 2012. Comprehensive sequence analysis of nine Usher syndrome genes in the UK National Collaborative Usher Study. *J Med Genet* 49(1):27-36.
- Lee K, Amin Ud Din M, Ansar M, Santos-Cortez RL, Ahmad W, Leal SM. 2011a. Autosomal Recessive Nonsyndromic Hearing Impairment due to a Novel Deletion in the RDX Gene. *Genet Res Int* 2011:294675.
- Lee K, Ansar M, Andrade PB, Khan B, Santos-Cortez RL, Ahmad W, Leal SM. 2012a. Novel CLDN14 mutations in Pakistani families with autosomal recessive non-syndromic hearing loss. *Am J Med Genet A* 158A(2):315-21.
- Lee K, Chiu I, Santos-Cortez RL, Basit S, Khan S, Azeem Z, Andrade PB, Kim SS, Ahmad W, Leal SM. 2013. Novel OTOA mutations cause autosomal recessive non-syndromic hearing impairment in Pakistani families. *Clin Genet* 84(3):294-6.
- Lee K, Khan S, Ansar M, Santos-Cortez RL, Ahmad W, Leal SM. 2011b. A Novel ESRRB Deletion Is a Rare Cause of Autosomal Recessive Nonsyndromic Hearing Impairment among Pakistani Families. *Genet Res Int* 2011:368915.
- Lee K, Khan S, Islam A, Ansar M, Andrade PB, Kim S, Santos-Cortez RL, Ahmad W, Leal SM. 2012b. Novel TMPRSS3 variants in Pakistani families with autosomal recessive non-syndromic hearing impairment. *Clin Genet* 82(1):56-63.
- Liburd N, Ghosh M, Riazuddin S, Naz S, Khan S, Ahmed Z, Riazuddin S, Liang Y, Menon PS, Smith T and others. 2001. Novel mutations of MYO15A associated with profound deafness in consanguineous families and moderately severe hearing loss in a patient with Smith-Magenis syndrome. *Hum Genet* 109(5):535-41.
- Mujtaba G, Schultz JM, Imtiaz A, Morell RJ, Friedman TB, Naz S. 2015. A mutation of MET, encoding hepatocyte growth factor receptor, is associated with human DFNB97 hearing loss. *J Med Genet* 52(8):548-52.
- Nal N, Ahmed ZM, Erkal E, Alper OM, Luleci G, Dinc O, Waryah AM, Ain Q, Tasneem S, Husnain T and others. 2007. Mutational spectrum of MYO15A: the large N-terminal extension of myosin XVA is required for hearing. *Hum Mutat* 28(10):1014-9.
- Nayak G, Varga L, Trincot C, Shahzad M, Friedman PL, Klimes I, Greinwald JH, Jr., Riazuddin SA, Masindova I, Profant M and others. 2015. Molecular genetics of MARVELD2 and clinical phenotype in Pakistani and Slovak families segregating DFNB49 hearing loss. *Hum Genet* 134(4):423-37.
- Naz S, Alasti F, Mowjoodi A, Riazuddin S, Sanati MH, Friedman TB, Griffith AJ, Wilcox ER, Riazuddin S. 2003. Distinctive audiometric profile associated with DFNB21 alleles of TECTA. *J Med Genet* 40(5):360-3.



- Naz S, Giguere CM, Kohrman DC, Mitchem KL, Riazuddin S, Morell RJ, Ramesh A, Srisailpathy S, Deshmukh D, Riazuddin S and others. 2002. Mutations in a novel gene, TMIE, are associated with hearing loss linked to the DFNB6 locus. *Am J Hum Genet* 71(3):632-6.
- Naz S, Griffith AJ, Riazuddin S, Hampton LL, Battey JF, Jr., Khan SN, Riazuddin S, Wilcox ER, Friedman TB. 2004. Mutations of ESPN cause autosomal recessive deafness and vestibular dysfunction. *J Med Genet* 41(8):591-5.
- Naz S, Imtiaz A, Mujtaba G, Maqsood A, Bashir R, Bukhari I, Khan MR, Ramzan M, Fatima A, Rehman AU and others. 2017. Genetic causes of moderate to severe hearing loss point to modifiers. *Clin Genet* 91(4):589-598.
- Park HJ, Shaikat S, Liu XZ, Hahn SH, Naz S, Ghosh M, Kim HN, Moon SK, Abe S, Tukamoto K and others. 2003. Origins and frequencies of SLC26A4 (PDS) mutations in east and south Asians: global implications for the epidemiology of deafness. *J Med Genet* 40(4):242-8.
- Prasad S, Kolln KA, Cucci RA, Trembath RC, Van Camp G, Smith RJ. 2004. Pendred syndrome and DFNB4-mutation screening of SLC26A4 by denaturing high-performance liquid chromatography and the identification of eleven novel mutations. *Am J Med Genet A* 124A(1):1-9.
- Reardon W, CF OM, Trembath R, Jan H, Phelps PD. 2000. Enlarged vestibular aqueduct: a radiological marker of pendred syndrome, and mutation of the PDS gene. *QJM* 93(2):99-104.
- Rehman AU, Bird JE, Faridi R, Shahzad M, Shah S, Lee K, Khan SN, Imtiaz A, Ahmed ZM, Riazuddin S and others. 2016. Mutational Spectrum of MYO15A and the Molecular Mechanisms of DFNB3 Human Deafness. *Hum Mutat* 37(10):991-1003.
- Rehman AU, Gul K, Morell RJ, Lee K, Ahmed ZM, Riazuddin S, Ali RA, Shahzad M, Jaleel AU, Andrade PB and others. 2011. Mutations of GIPC3 cause nonsyndromic hearing loss DFNB72 but not DFNB81 that also maps to chromosome 19p. *Hum Genet* 130(6):759-65.
- Rehman AU, Morell RJ, Belyantseva IA, Khan SY, Boger ET, Shahzad M, Ahmed ZM, Riazuddin S, Khan SN, Riazuddin S and others. 2010. Targeted capture and next-generation sequencing identifies C9orf75, encoding taperin, as the mutated gene in nonsyndromic deafness DFNB79. *Am J Hum Genet* 86(3):378-88.
- Rehman AU, Santos-Cortez RL, Drummond MC, Shahzad M, Lee K, Morell RJ, Ansar M, Jan A, Wang X, Aziz A and others. 2015. Challenges and solutions for gene identification in the presence of familial locus heterogeneity. *Eur J Hum Genet* 23(9):1207-15.
- Rehman AU, Santos-Cortez RL, Morell RJ, Drummond MC, Ito T, Lee K, Khan AA, Basra MA, Wasif N, Ayub M and others. 2014. Mutations in TBC1D24, a gene associated with epilepsy, also cause nonsyndromic deafness DFNB86. *Am J Hum Genet* 94(1):144-52.
- Riazuddin S, Ahmed ZM, Fanning AS, Lagziel A, Kitajiri S, Ramzan K, Khan SN, Chattaraj P, Friedman PL, Anderson JM and others. 2006a. Tricellulin is a tight-junction protein necessary for hearing. *Am J Hum Genet* 79(6):1040-51.
- Riazuddin S, Anwar S, Fischer M, Ahmed ZM, Khan SY, Janssen AG, Zafar AU, Scholl U, Husnain T, Belyantseva IA and others. 2009. Molecular basis of DFNB73:

- mutations of BSND can cause nonsyndromic deafness or Bartter syndrome. *Am J Hum Genet* 85(2):273-80.
- Riazuddin S, Belyantseva IA, Giese AP, Lee K, Indzhukulian AA, Nandamuri SP, Yousaf R, Sinha GP, Lee S, Terrell D and others. 2012. Alterations of the CIB2 calcium- and integrin-binding protein cause Usher syndrome type 1J and nonsyndromic deafness DFNB48. *Nat Genet* 44(11):1265-71.
- Riazuddin S, Khan SN, Ahmed ZM, Ghosh M, Caution K, Nazli S, Kabra M, Zafar AU, Chen K, Naz S and others. 2006b. Mutations in TRIOBP, which encodes a putative cytoskeletal-organizing protein, are associated with nonsyndromic recessive deafness. *Am J Hum Genet* 78(1):137-43.
- Riazuddin S, Nazli S, Ahmed ZM, Yang Y, Zulfiqar F, Shaikh RS, Zafar AU, Khan SN, Sabar F, Javid FT and others. 2008. Mutation spectrum of MYO7A and evaluation of a novel nonsyndromic deafness DFNB2 allele with residual function. *Hum Mutat* 29(4):502-11.
- Santos-Cortez RL, Faridi R, Rehman AU, Lee K, Ansar M, Wang X, Morell RJ, Isaacson R, Belyantseva IA, Dai H and others. 2016. Autosomal-Recessive Hearing Impairment Due to Rare Missense Variants within S1PR2. *Am J Hum Genet* 98(2):331-8.
- Santos-Cortez RL, Lee K, Azeem Z, Antonellis PJ, Pollock LM, Khan S, Irfanullah, Andrade-Elizondo PB, Chiu I, Adams MD and others. 2013. Mutations in KARS, encoding lysyl-tRNA synthetase, cause autosomal-recessive nonsyndromic hearing impairment DFNB89. *Am J Hum Genet* 93(1):132-40.
- Santos-Cortez RL, Lee K, Giese AP, Ansar M, Amin-Ud-Din M, Rehn K, Wang X, Aziz A, Chiu I, Hussain Ali R and others. 2014. Adenylate cyclase 1 (ADCY1) mutations cause recessive hearing impairment in humans and defects in hair cell function and hearing in zebrafish. *Hum Mol Genet* 23(12):3289-98.
- Santos RL, El-Shanti H, Sikandar S, Lee K, Bhatti A, Yan K, Chahrour MH, McArthur N, Pham TL, Mahasneh AA and others. 2006. Novel sequence variants in the TMIE gene in families with autosomal recessive nonsyndromic hearing impairment. *J Mol Med (Berl)* 84(3):226-31.
- Santos RL, Wajid M, Khan MN, McArthur N, Pham TL, Bhatti A, Lee K, Irshad S, Mir A, Yan K and others. 2005a. Novel sequence variants in the TMC1 gene in Pakistani families with autosomal recessive hearing impairment. *Hum Mutat* 26(4):396.
- Santos RL, Wajid M, Pham TL, Hussan J, Ali G, Ahmad W, Leal SM. 2005b. Low prevalence of Connexin 26 (GJB2) variants in Pakistani families with autosomal recessive non-syndromic hearing impairment. *Clin Genet* 67(1):61-8.
- Schraders M, Lee K, Oostrik J, Huygen PL, Ali G, Hoefsloot LH, Veltman JA, Cremers FP, Basit S, Ansar M and others. 2010. Homozygosity mapping reveals mutations of GRXCR1 as a cause of autosomal-recessive nonsyndromic hearing impairment. *Am J Hum Genet* 86(2):138-47.
- Schultz JM, Bhatti R, Madeo AC, Turriff A, Muskett JA, Zalewski CK, King KA, Ahmed ZM, Riazuddin S, Ahmad N and others. 2011. Allelic hierarchy of CDH23 mutations causing non-syndromic deafness DFNB12 or Usher syndrome USH1D in compound heterozygotes. *J Med Genet* 48(11):767-75.

- Schultz JM, Khan SN, Ahmed ZM, Riazuddin S, Waryah AM, Chhatre D, Starost MF, Ploplis B, Buckley S, Velasquez D and others. 2009. Noncoding mutations of HGF are associated with nonsyndromic hearing loss, DFNB39. *Am J Hum Genet* 85(1):25-39.
- Seco CZ, Giese AP, Shafique S, Schraders M, Oonk AM, Grossheim M, Oostrik J, Strom T, Hegde R, van Wijk E and others. 2016. Novel and recurrent CIB2 variants, associated with nonsyndromic deafness, do not affect calcium buffering and localization in hair cells. *Eur J Hum Genet* 24(4):542-9.
- Shabbir MI, Ahmed ZM, Khan SY, Riazuddin S, Waryah AM, Khan SN, Camps RD, Ghosh M, Kabra M, Belyantseva IA and others. 2006. Mutations of human TMHS cause recessively inherited non-syndromic hearing loss. *J Med Genet* 43(8):634-40.
- Shahzad M, Sivakumaran TA, Qaiser TA, Schultz JM, Hussain Z, Flanagan M, Bhinder MA, Kissell D, Greinwald JH, Jr., Khan SN and others. 2013. Genetic analysis through OtoSeq of Pakistani families segregating prelingual hearing loss. *Otolaryngol Head Neck Surg* 149(3):478-87.
- Simon M, Richard EM, Wang X, Shahzad M, Huang VH, Qaiser TA, Potluri P, Mahl SE, Davila A, Nazli S and others. 2015. Mutations of human NARS2, encoding the mitochondrial asparaginyl-tRNA synthetase, cause nonsyndromic deafness and Leigh syndrome. *PLoS Genet* 11(3):e1005097.
- Sirmaci A, Duman D, Ozturkmen-Akay H, Erbek S, Incesulu A, Ozturk-Hismi B, Arici ZS, Yuksel-Konuk EB, Tasir-Yilmaz S, Tokgoz-Yilmaz S and others. 2009. Mutations in TMC1 contribute significantly to nonsyndromic autosomal recessive sensorineural hearing loss: a report of five novel mutations. *Int J Pediatr Otorhinolaryngol* 73(5):699-705.
- Van Hauwe P, Everett LA, Coucke P, Scott DA, Kraft ML, Ris-Stalpers C, Bolder C, Otten B, de Vijlder JJ, Dietrich NL and others. 1998. Two frequent missense mutations in Pendred syndrome. *Hum Mol Genet* 7(7):1099-104.
- Weston MD, Kelley PM, Overbeck LD, Wagenaar M, Orten DJ, Hasson T, Chen ZY, Corey D, Mooseker M, Sumegi J and others. 1996. Myosin VIIA mutation screening in 189 Usher syndrome type 1 patients. *Am J Hum Genet* 59(5):1074-83.
- Wilcox ER, Burton QL, Naz S, Riazuddin S, Smith TN, Ploplis B, Belyantseva I, Ben-Yosef T, Liburd NA, Morell RJ and others. 2001. Mutations in the gene encoding tight junction claudin-14 cause autosomal recessive deafness DFNB29. *Cell* 104(1):165-72.
- Yousaf R, Ahmed ZM, Giese AP, Morell RJ, Lagziel A, Dabdoub A, Wilcox ER, Riazuddin S, Friedman TB, Riazuddin S. 2018a. Modifier variant of METTL13 suppresses human GAB1-associated profound deafness. *J Clin Invest*.
- Yousaf R, Gu C, Ahmed ZM, Khan SN, Friedman TB, Riazuddin S, Shears SB, Riazuddin S. 2018b. Mutations in Diphosphoinositol-Pentakisphosphate Kinase PPIP5K2 are associated with hearing loss in human and mouse. *PLoS Genet* 14(3):e1007297.
